# Supplementary material
Source: PubMed Central journal article supplement (PMC7860519)
Supplement: ao0c05779_si_001.pdf [file ao0c05779_si_001.pdf]

# Room Temperature, Deep-Red/NIR-Emissive, C<sub>3</sub>-Symmetric (n,π-conjugated) Columnar Liquid Crystals: C<sub>3h</sub>-Tris(keto-hydrazone)s

Rashmi Ashwathama Nayak <sup>a,b</sup> Bhyranalyar Nagarajappa Veerabhadraswamy <sup>a</sup> and,  
Doddamane S. Shankar Rao, <sup>a</sup> Achalkumar Ammathnadu Sudhakar, <sup>c</sup>  
Channabasaveshwar V. Yelamaggad\* <sup>a</sup>

<sup>a</sup> *Centre for Nano and Soft Matter Sciences,  
P. B. No. 1329, Jalahalli, Bangalore 560013, India.*

<sup>b</sup> *Present address: CSIR-National Chemical Laboratory,  
Dr. Homi Bhabha Road, Pune-411 008, India*

<sup>c</sup> *Department of Chemistry,  
Indian Institute of Technology Guwahati, Guwahati 781039, India.*

\* Corresponding author : [yelamaggad@cens.res.in](mailto:yelamaggad@cens.res.in); [yelamaggad@gmail.com](mailto:yelamaggad@gmail.com)

## Supporting Information

### Contents

- Figure S1: <sup>1</sup>H NMR spectrum of compound **1d**
- Figure S2: <sup>13</sup>C NMR spectrum of compound **1d**
- Figure S3: <sup>1</sup>H NMR spectrum of compound **2d**
- Figure S4: <sup>13</sup>C NMR spectrum of compound **2d**
- Figure S5: <sup>1</sup>H NMR spectrum of compound **3d**
- Figure S6: <sup>13</sup>C NMR spectrum of compound **3d**
- Figure S7: <sup>1</sup>H NMR spectrum of compound **4d**
- Figure S8: <sup>13</sup>C NMR spectrum of compound **4d**
- Figure S9: <sup>1</sup>H NMR spectrum of compound **5d**
- Figure S10: <sup>13</sup>C NMR spectrum of compound **5d**
- Figure S11: <sup>1</sup>H NMR spectrum of compound **6d**
- Figure S12: <sup>13</sup>C NMR spectrum of compound **6d**
- Figure S13: <sup>1</sup>H NMR spectrum of compound **THN(6)6**
- Figure S14: <sup>13</sup>C NMR spectrum of compound **THN(6)6**
- Figure S15: <sup>1</sup>H NMR spectrum of compound **THN(6)7**
- Figure S16: <sup>13</sup>C NMR spectrum of compound **THN(6)7**

- Figure S17:  $^1\text{H}$  NMR spectrum of compound **THN(6)8**
- Figure S18:  $^{13}\text{C}$  NMR spectrum of compound **THN(6)8**
- Figure S19:  $^1\text{H}$  NMR spectrum of compound **THN(6)9**
- Figure S20:  $^{13}\text{C}$  NMR spectrum of compound **THN(6)9**
- Figure S21:  $^1\text{H}$  NMR spectrum of compound **THN(6)10**
- Figure S22:  $^{13}\text{C}$  NMR spectrum of compound **THN(6)10**
- Figure S23:  $^1\text{H}$  NMR spectrum of compound **THN(6)11**
- Figure S24:  $^{13}\text{C}$  NMR spectrum of compound **THN(6)11**
- Figure S25:  $^1\text{H}$  NMR spectrum of compound **THN(6)12**
- Figure S26:  $^{13}\text{C}$  NMR spectrum of compound **THN(6)12**
- Figure S27:  $^1\text{H}$  NMR spectrum of compound **THN(6)10B**
- Figure S28:  $^{13}\text{C}$  NMR spectrum of compound **THN(6)10B**
- Figure S29:  $^1\text{H}$  NMR spectrum of compound **THN(9)6**
- Figure S30:  $^{13}\text{C}$  NMR spectrum of compound **THN(9)6**
- Figure S31:  $^1\text{H}$  NMR spectrum of compound **THN(9)7**
- Figure S32:  $^{13}\text{C}$  NMR spectrum of compound **THN(9)7**
- Figure S33:  $^1\text{H}$  NMR spectrum of compound **THN(9)8**
- Figure S34:  $^{13}\text{C}$  NMR spectrum of compound **THN(9)8**
- Figure S35:  $^1\text{H}$  NMR spectrum of compound **THN(9)9**
- Figure S36:  $^{13}\text{C}$  NMR spectrum of compound **THN(9)9**
- Figure S37:  $^1\text{H}$  NMR spectrum of compound **THN(9)10**
- Figure S38:  $^{13}\text{C}$  NMR spectrum of compound **THN(9)10**
- Figure S39:  $^1\text{H}$  NMR spectrum of compound **THN(9)11**
- Figure S40:  $^{13}\text{C}$  NMR spectrum of compound **THN(9)11**
- Figure S41:  $^1\text{H}$  NMR spectrum of compound **THN(9)12**
- Figure S42:  $^{13}\text{C}$  NMR spectrum of compound **THN(9)12**
- Figure S43:  $^1\text{H}$  NMR spectrum of compound **THN(9)10B**
- Figure S44:  $^{13}\text{C}$  NMR spectrum of compound **THN(9)10B**
- Figure S45. TGA graphs of representative LCs **THN(6)6** & **THN(9)6**
- Figure S46: Photomicrographs of the defect textures observed for the Col phase exhibited by discogens of **THN(6)n** and **THN(9)n** series.
- Figure S47: DSC thermograms obtained for discotics belonging to **THN(6)n** series during first heating (top trace) and cooling (bottom curve) cycles at a rate of  $5^\circ\text{C}/\text{min}$ .
- Figure S48: The 1D intensity vs  $2\theta$  profiles obtained for the  $\text{Col}_h$  phase of **THN(6)8**, **THN(6)10**, **THN(6)12** and **THN(9)6**, **THN(9)9**, **THN(9)11** and **THN(9)10B**.
- Figure S49: UV-Vis (a) & (b) and emission (c) & (d) spectra of discotic LCs belonging to **THN(6)n** and **THN(9)n** series in the dichloromethane solution.
- Figure S50: Solid state (thin film) absorption and emission spectra of **TNH(6)n** and **TNH(9)n** series of compounds
- Figure S51: The emission spectra recorded as function of temperature for the Col phase of several representative discotic LCs chosen from **TNH(6)n** and **TNH(9)n** series.
- Table S1: Quantum yield of **THN(6)6** and **THN(9)6** discotics
- Figure S52. Plots of integrated fluorescence intensity vs the absorbance of compounds **THN(6)6**, and **THN(9)6** at different concentrations in dichloromethane (DCM)
- References

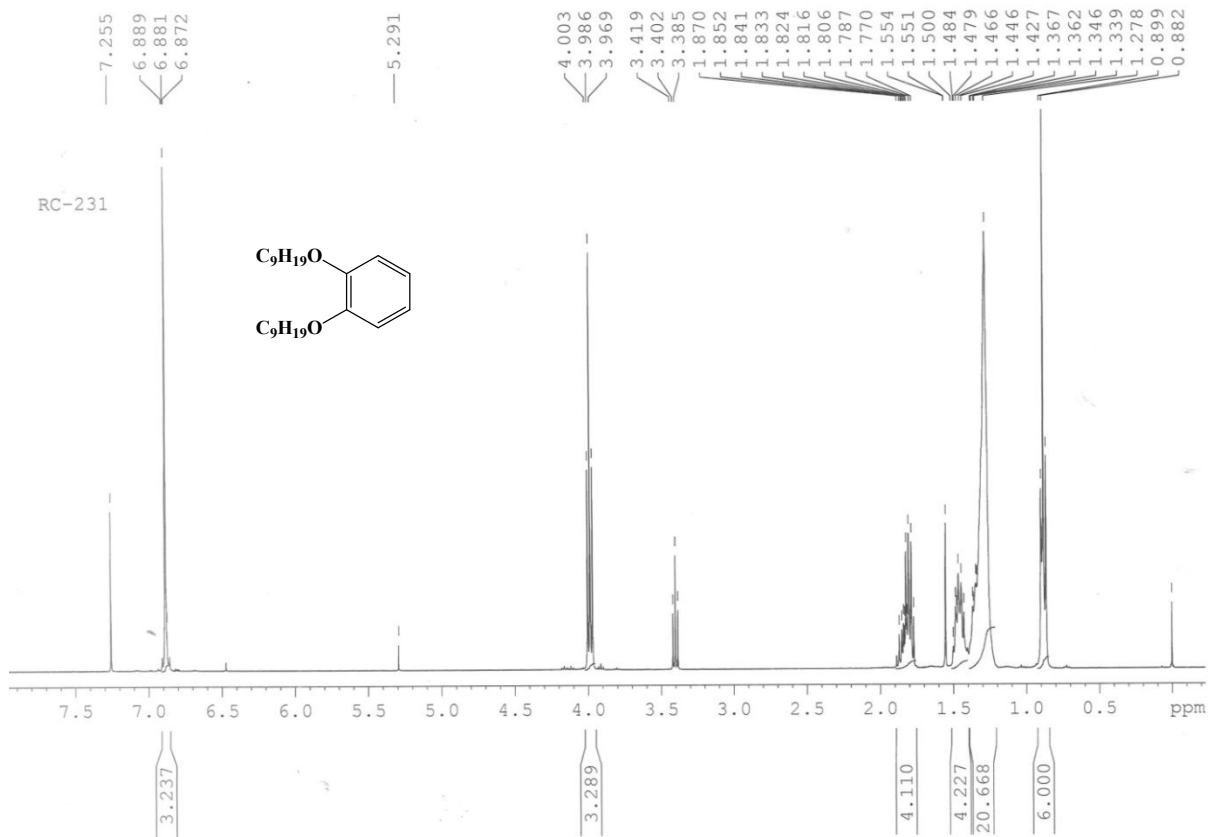

**Figure S1.**  $^1H$  NMR spectrum of compound **1d** (400MHz;  $CDCl_3$ )

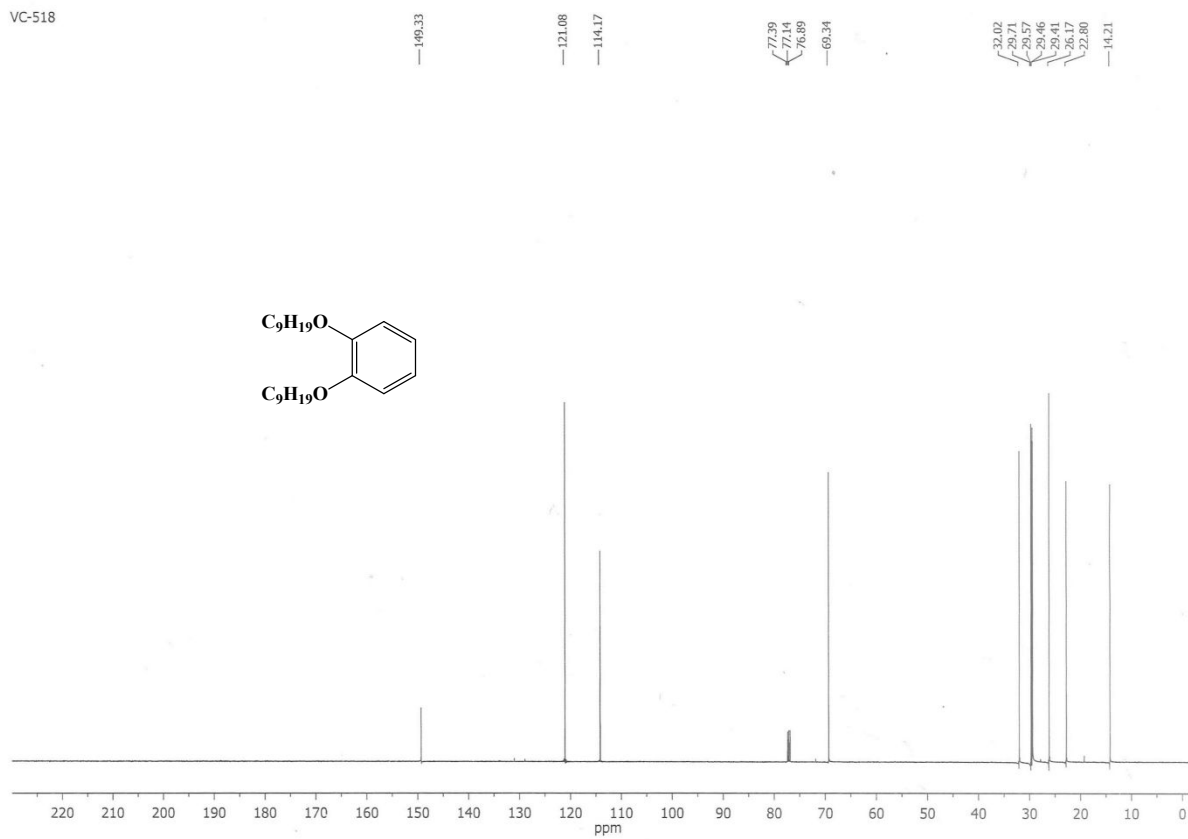

**Figure S2.**  $^{13}C$  NMR spectrum of compound **1d** (100MHz;  $CDCl_3$ )

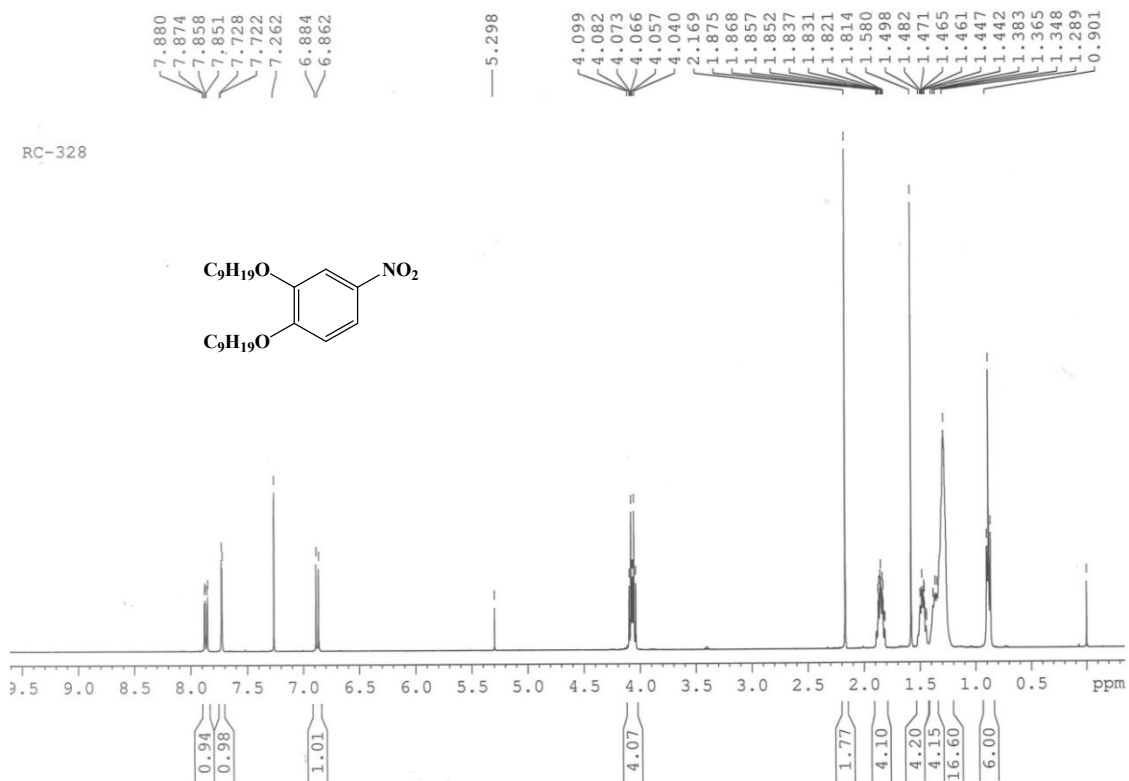

**Figure S3.**  $^1\text{H}$  NMR spectrum of compound **2d** (400MHz;  $\text{CDCl}_3$ )

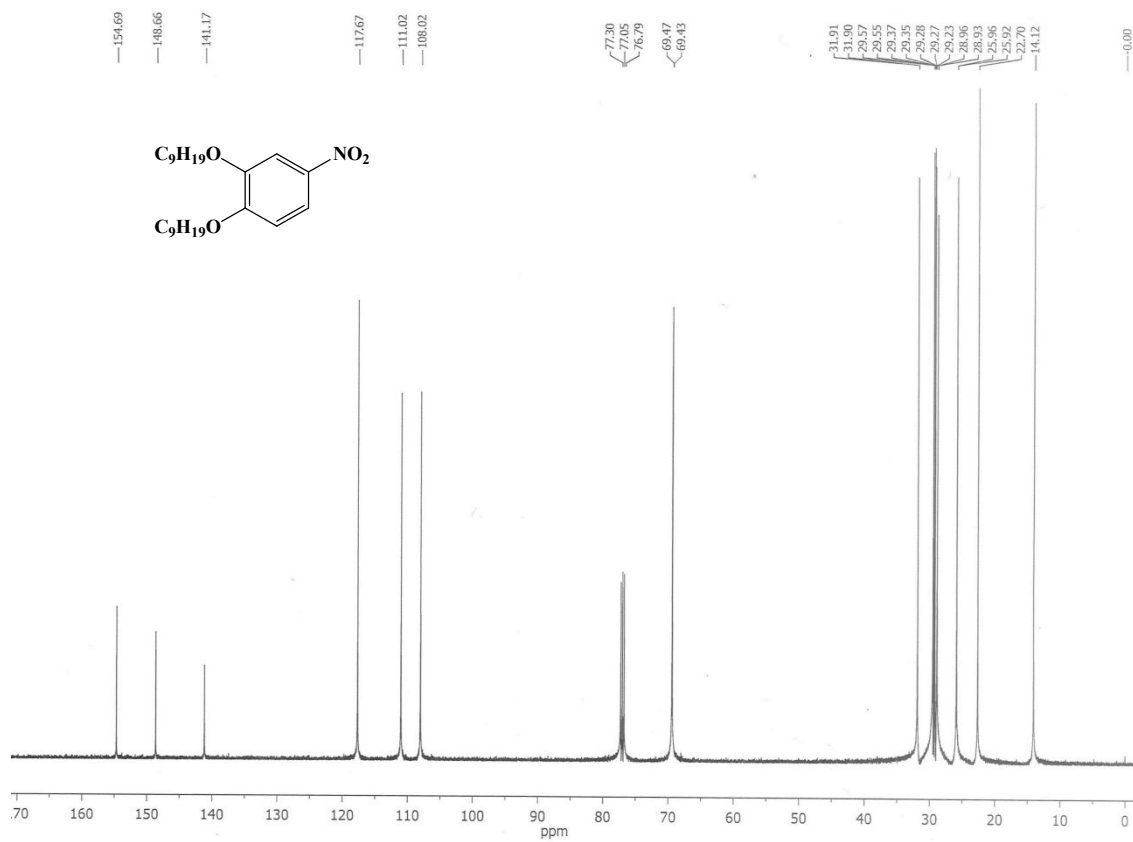

**Figure S4.**  $^{13}\text{C}$  NMR spectrum of compound **2d** (100MHz;  $\text{CDCl}_3$ )

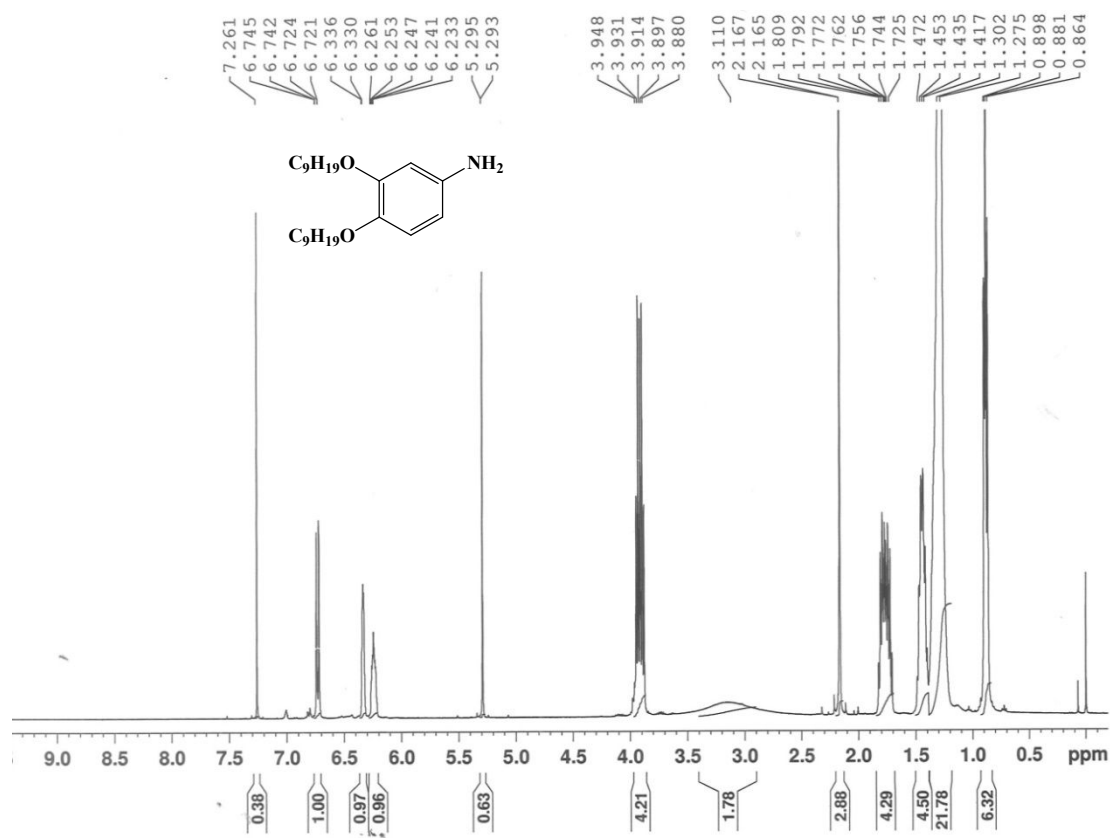

Figure S5.  $^1\text{H}$  NMR spectrum of compound 3d (400MHz;  $\text{CDCl}_3$ )

VC-520

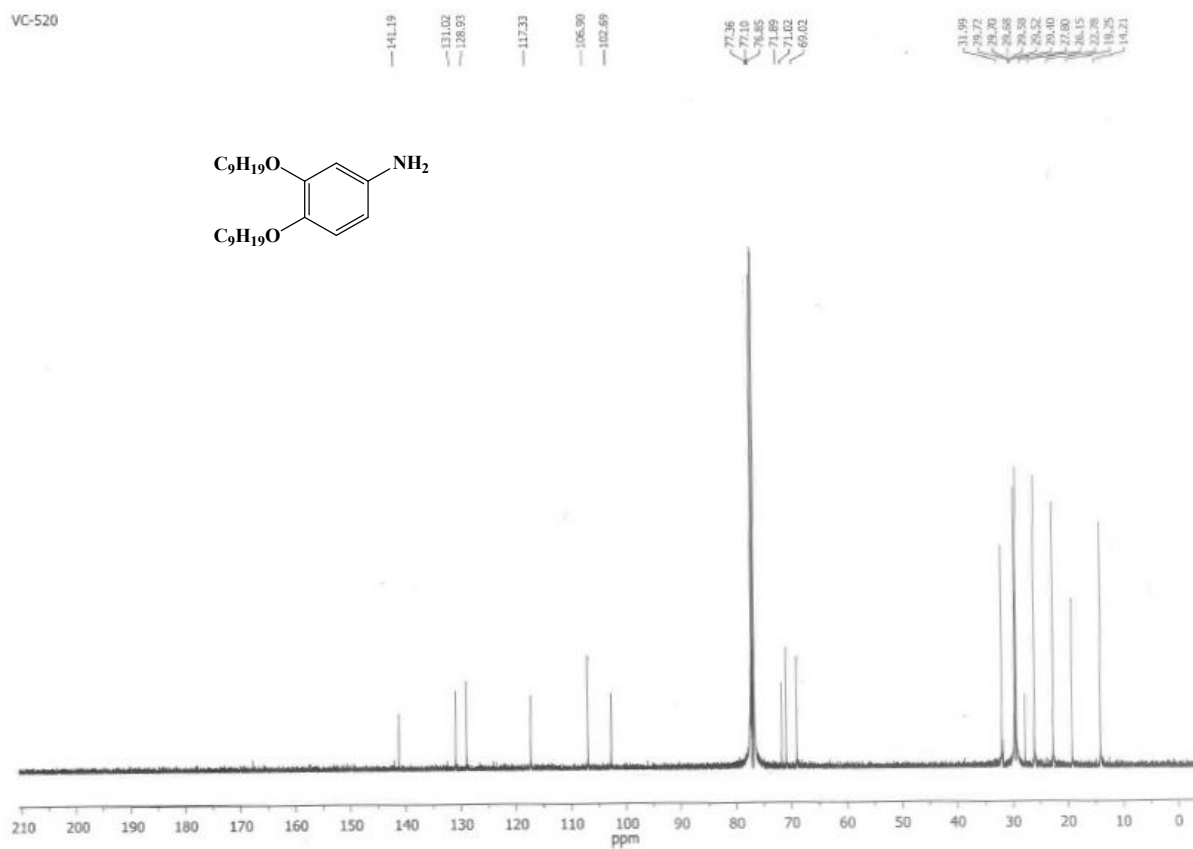

**Figure S6.**  $^{13}\text{C}$  NMR spectrum of compound **3d** (100MHz;  $\text{CDCl}_3$ )

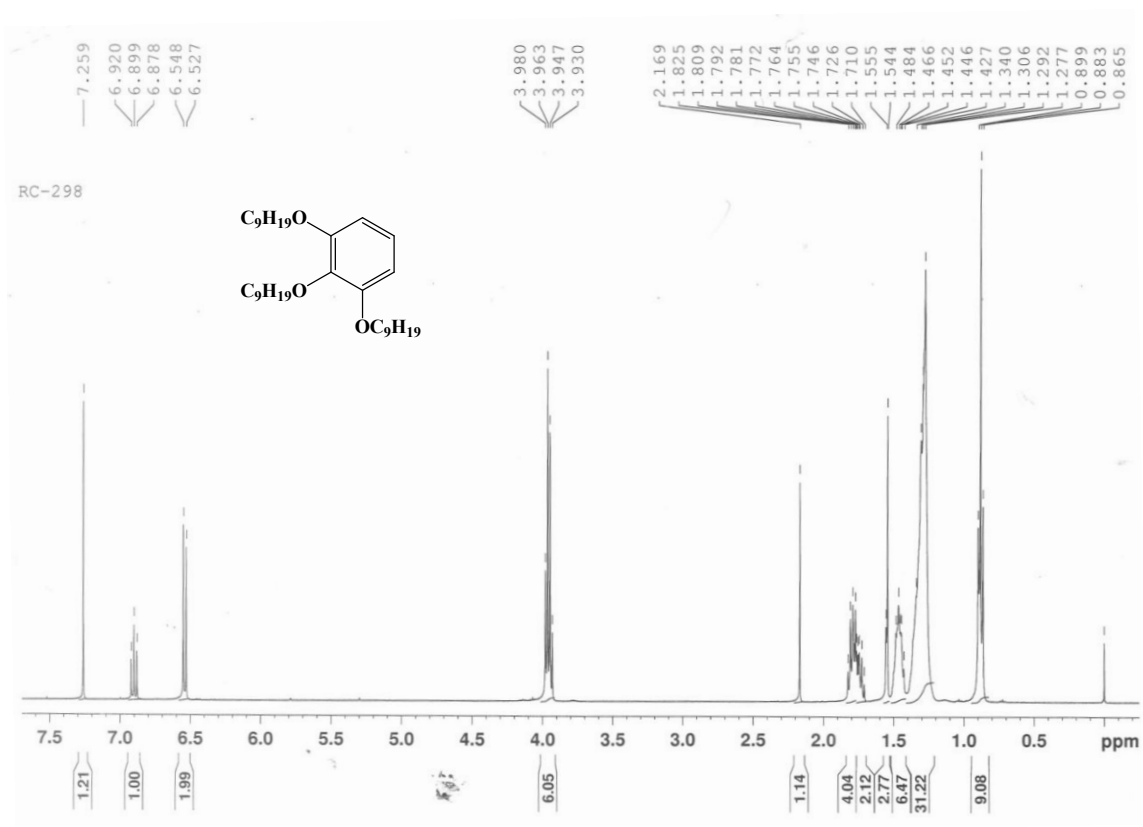

**Figure S7.**  $^1\text{H}$  NMR spectrum of compound **4d** (400MHz;  $\text{CDCl}_3$ )

VC-516

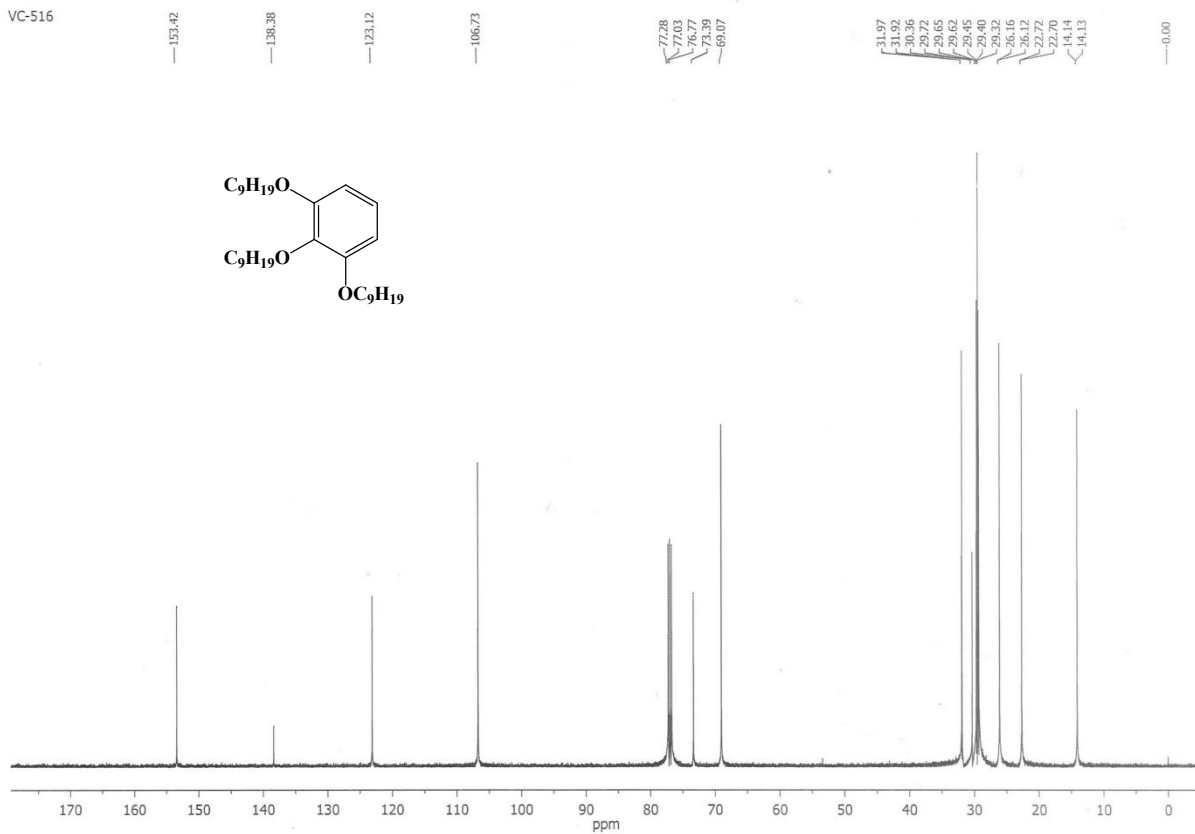

**Figure S8.**  $^{13}\text{C}$  NMR spectrum of compound **4d** (100MHz;  $\text{CDCl}_3$ )

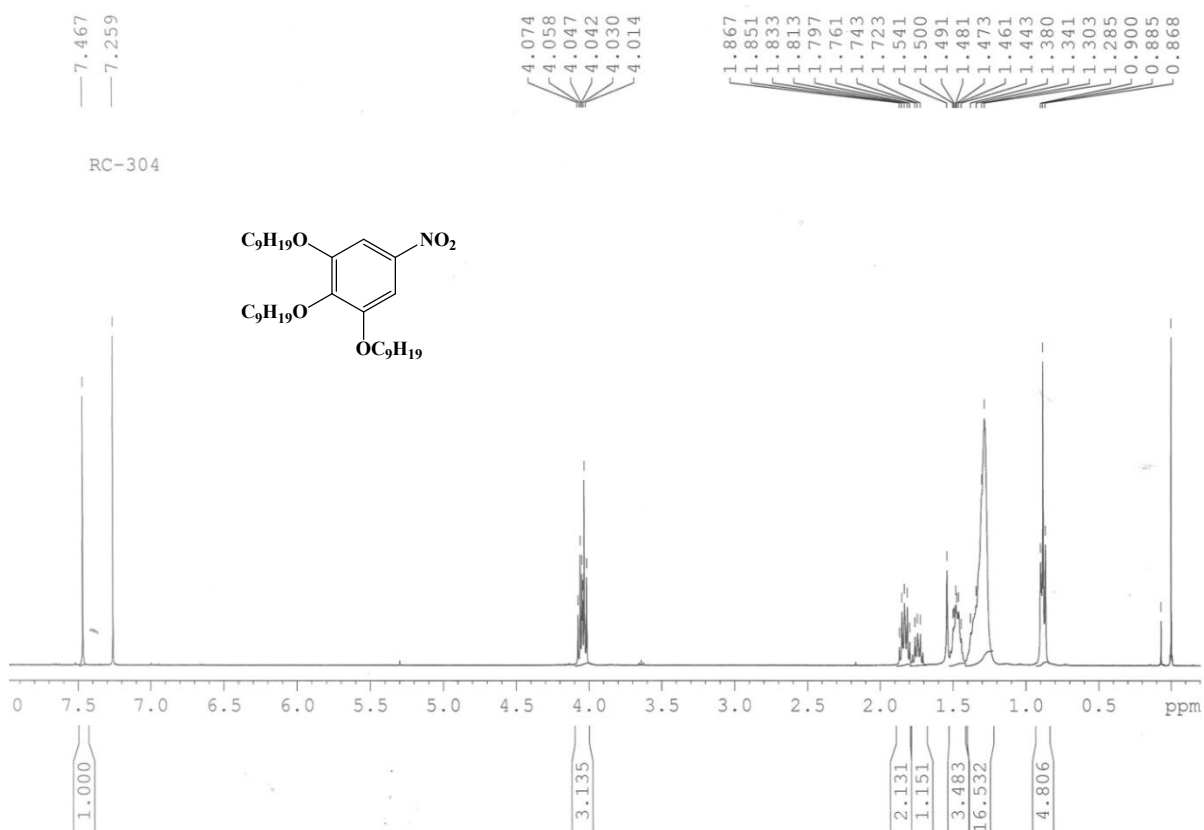

**Figure S9.**  $^1\text{H}$  NMR spectrum of compound **5d** (400MHz;  $\text{CDCl}_3$ )

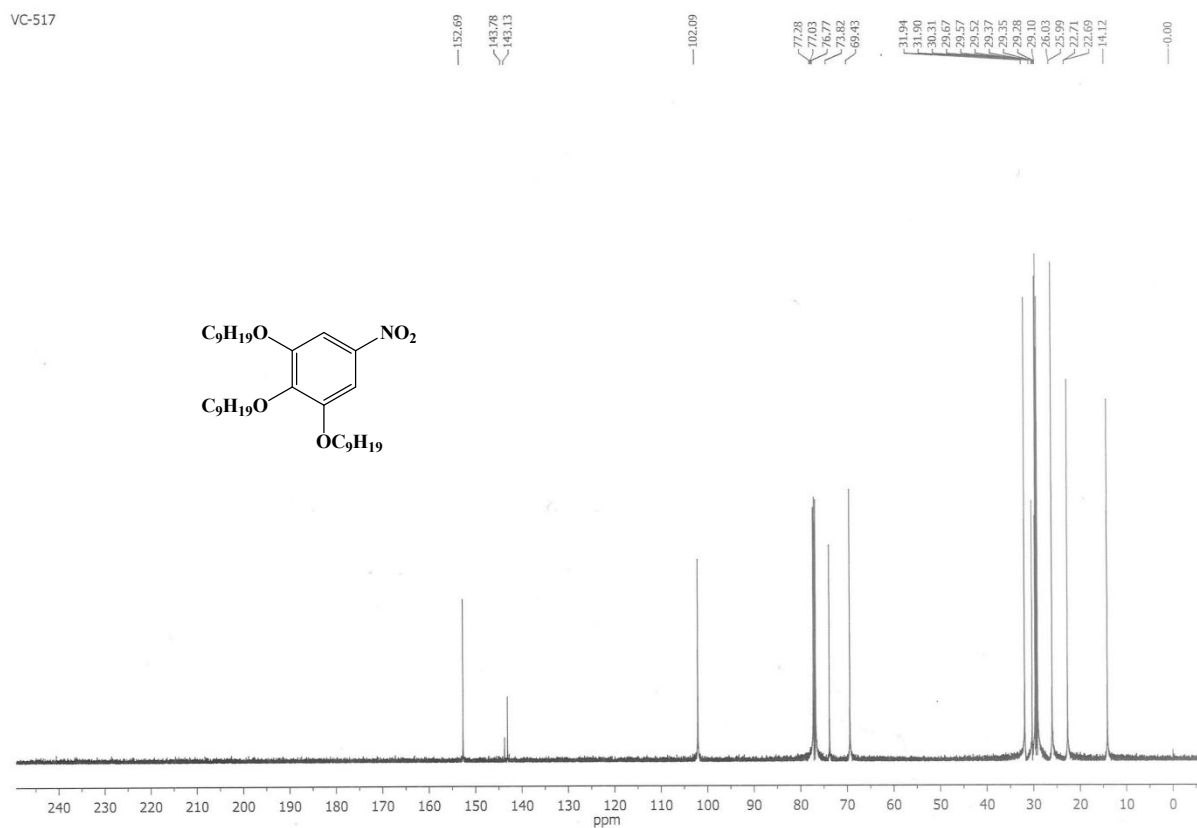

**Figure S10.**  $^{13}\text{C}$  NMR spectrum of compound **5d** (100MHz;  $\text{CDCl}_3$ )



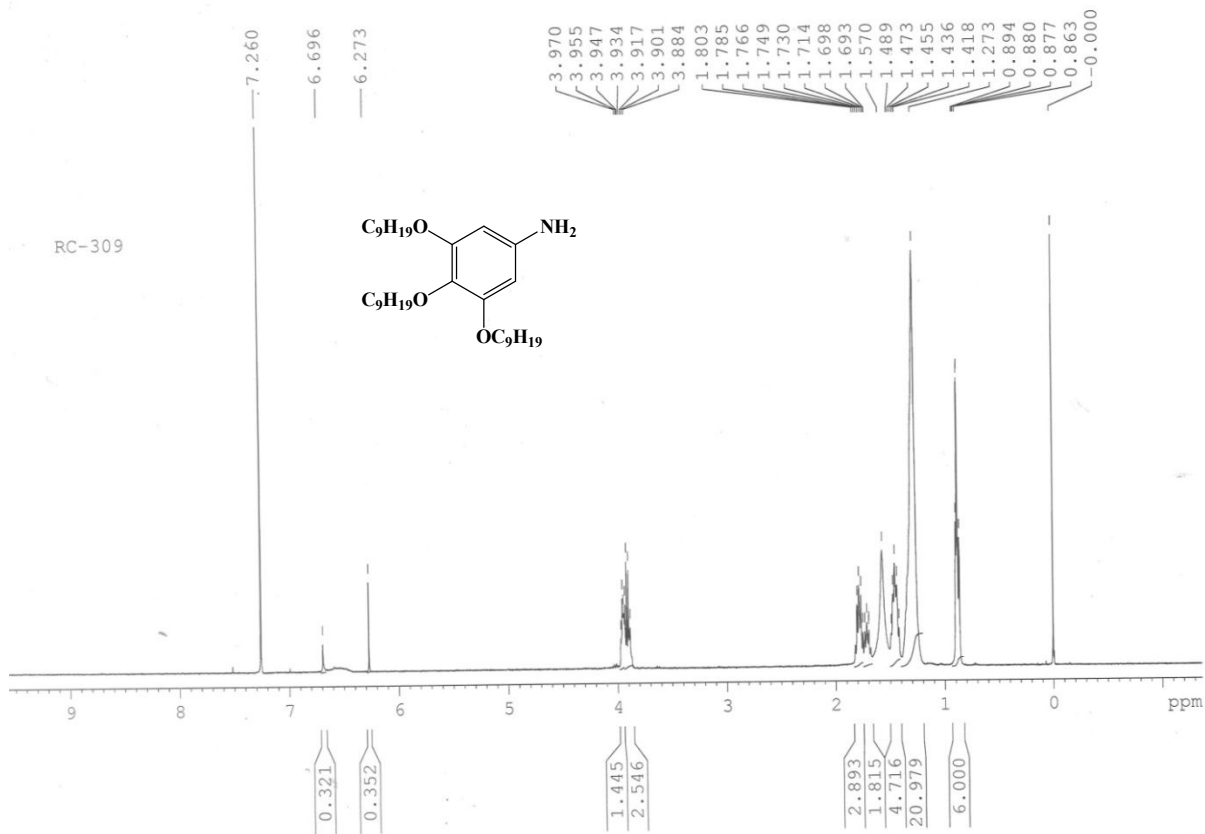

**Figure S11.**  $^1\text{H}$  NMR spectrum of compound **6d** (400MHz;  $\text{CDCl}_3$ )

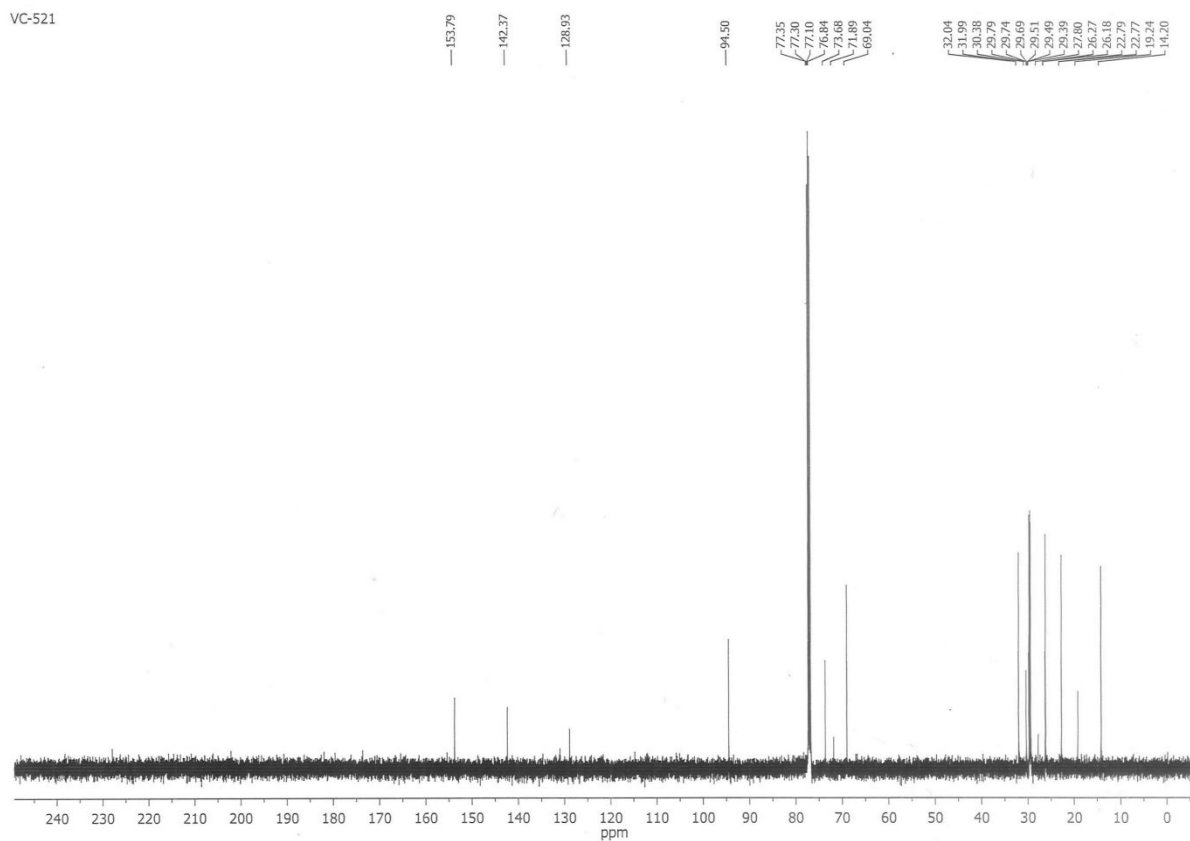

**Figure S12.**  $^{13}\text{C}$  NMR spectrum of compound **6d** (100MHz;  $\text{CDCl}_3$ )

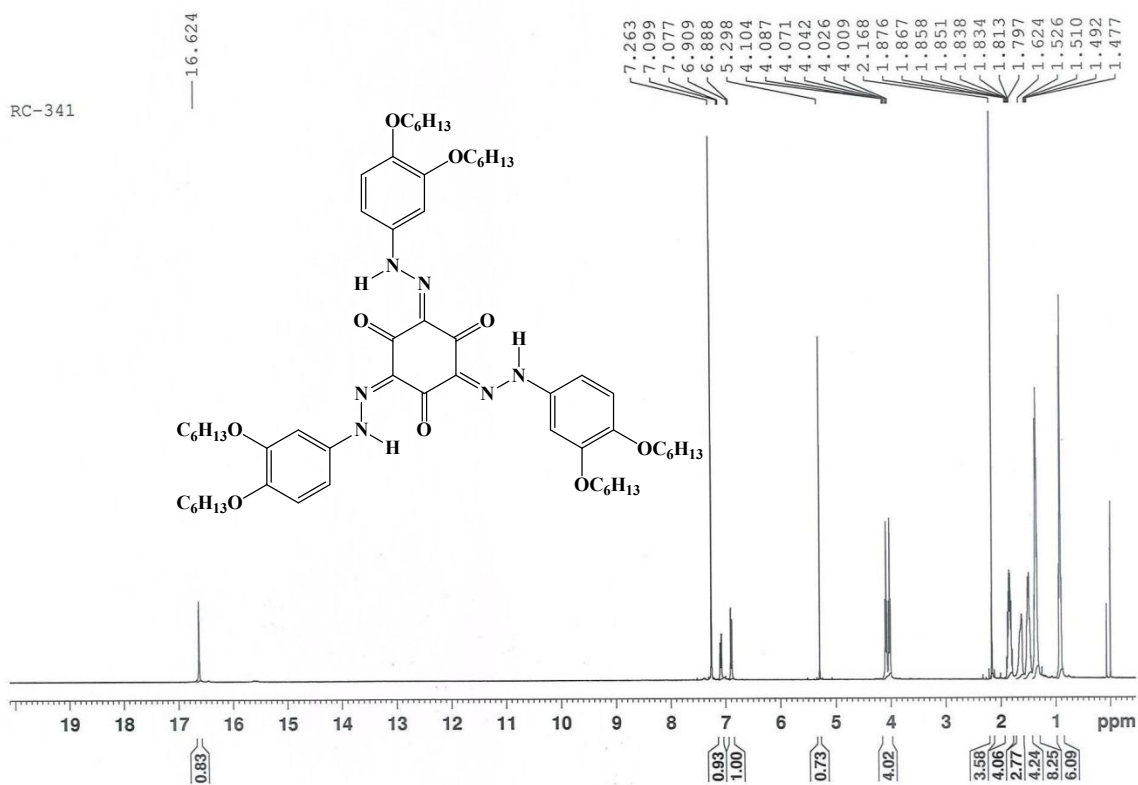

**Figure S13.**  $^1\text{H}$  NMR spectrum of compound **THN(6)6** (400MHz;  $\text{CDCl}_3$ )

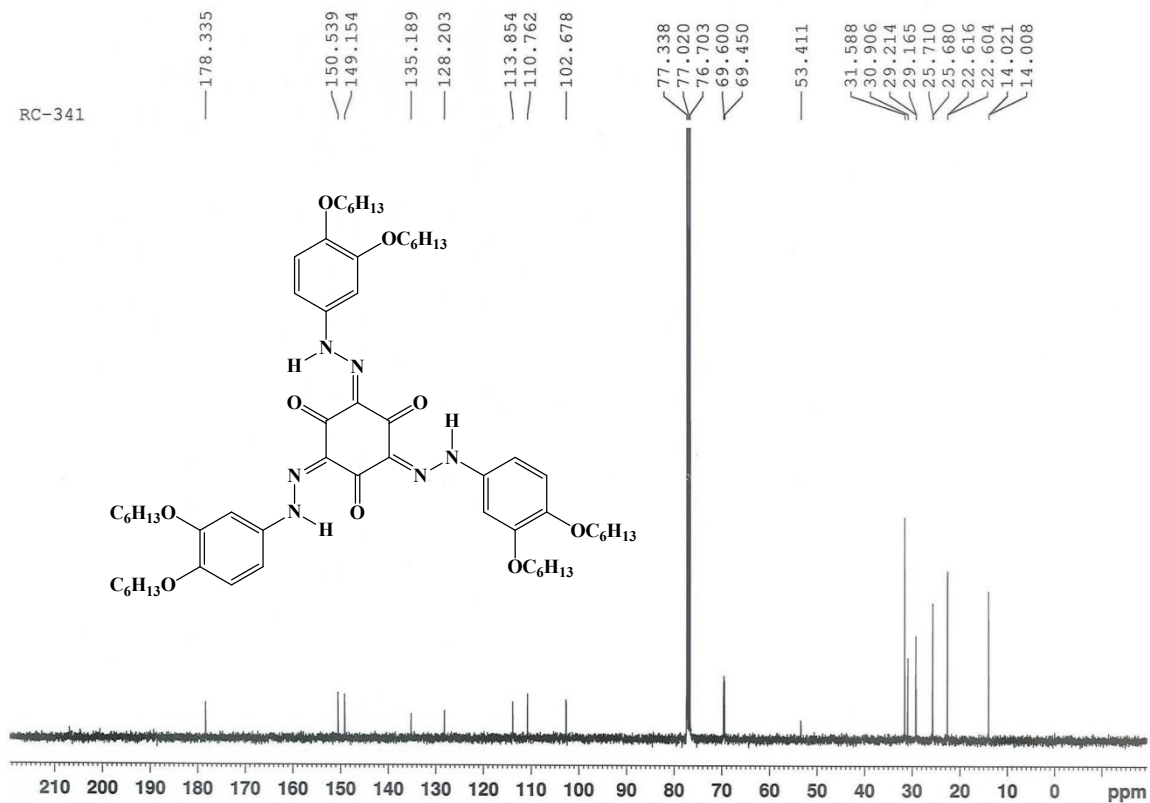

Figure S14.  $^{13}\text{C}$  NMR spectrum of compound THN(6)6 (100MHz;  $\text{CDCl}_3$ )

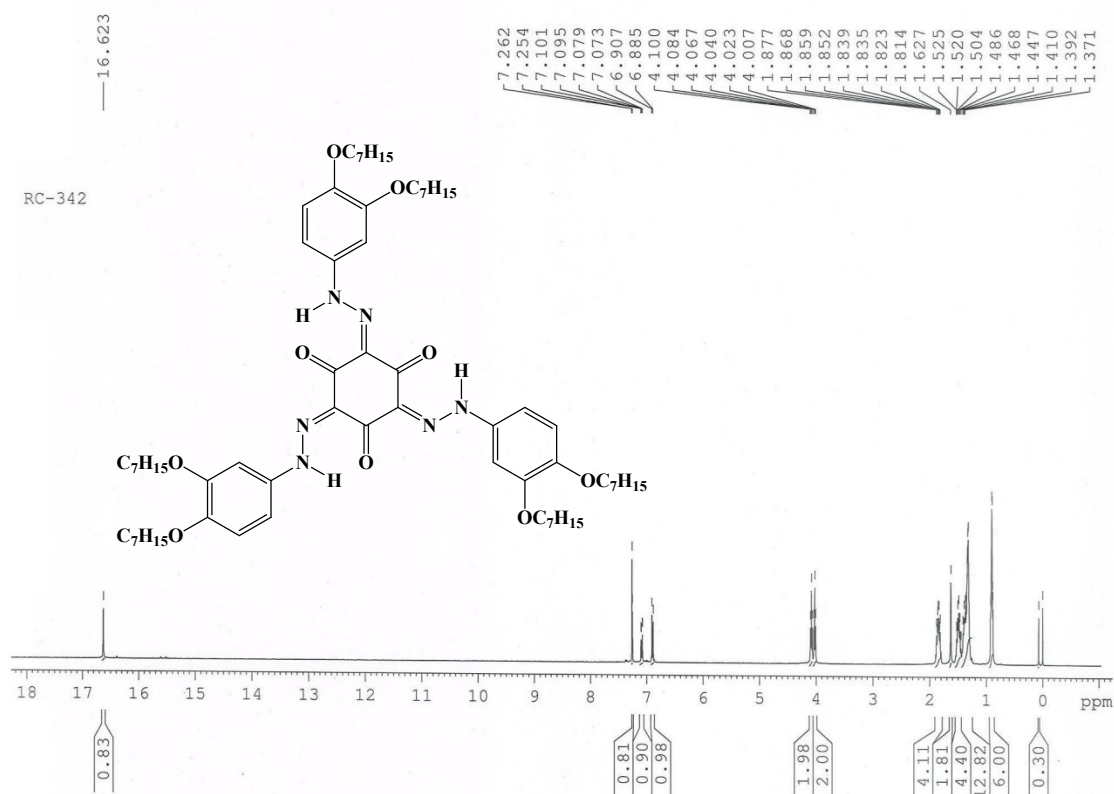

Figure S15.  $^1\text{H}$  NMR spectrum of compound THN(6)7 (400MHz;  $\text{CDCl}_3$ )

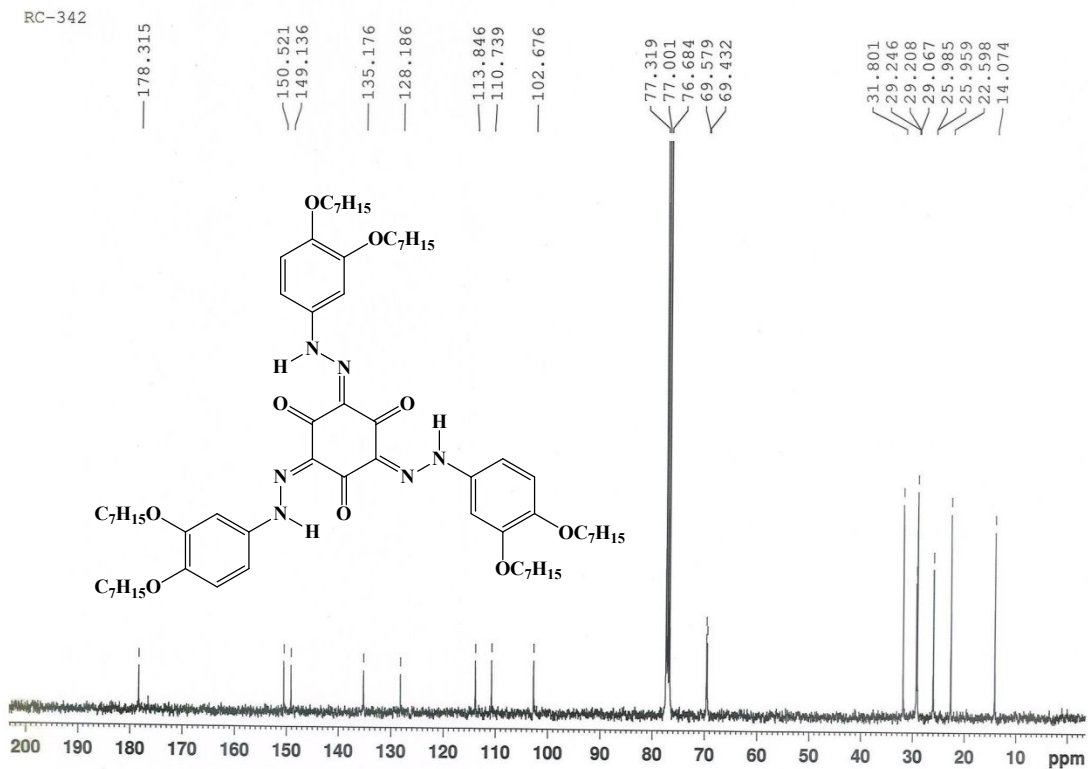

Figure S16. <sup>13</sup>C NMR spectrum of compound THN(6)7 (100MHz; CDCl<sub>3</sub>)

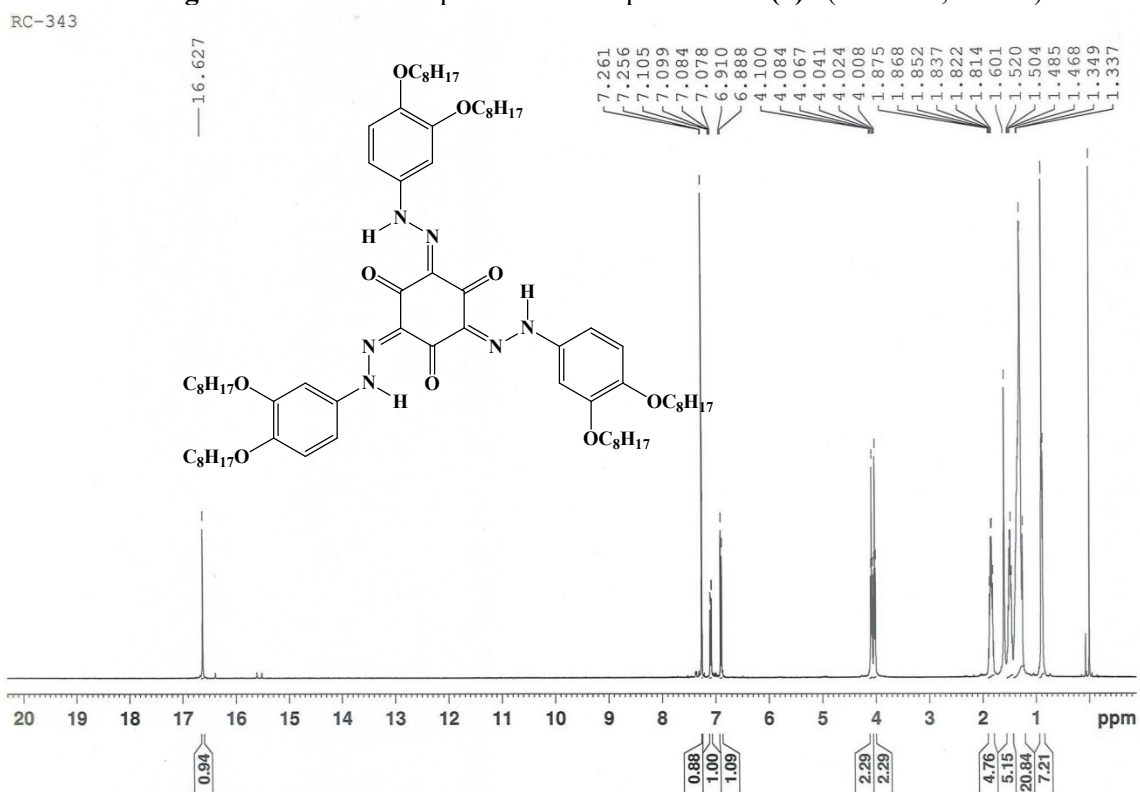

Figure S17. <sup>1</sup>H NMR spectrum of compound THN(6)8 (400MHz; CDCl<sub>3</sub>)

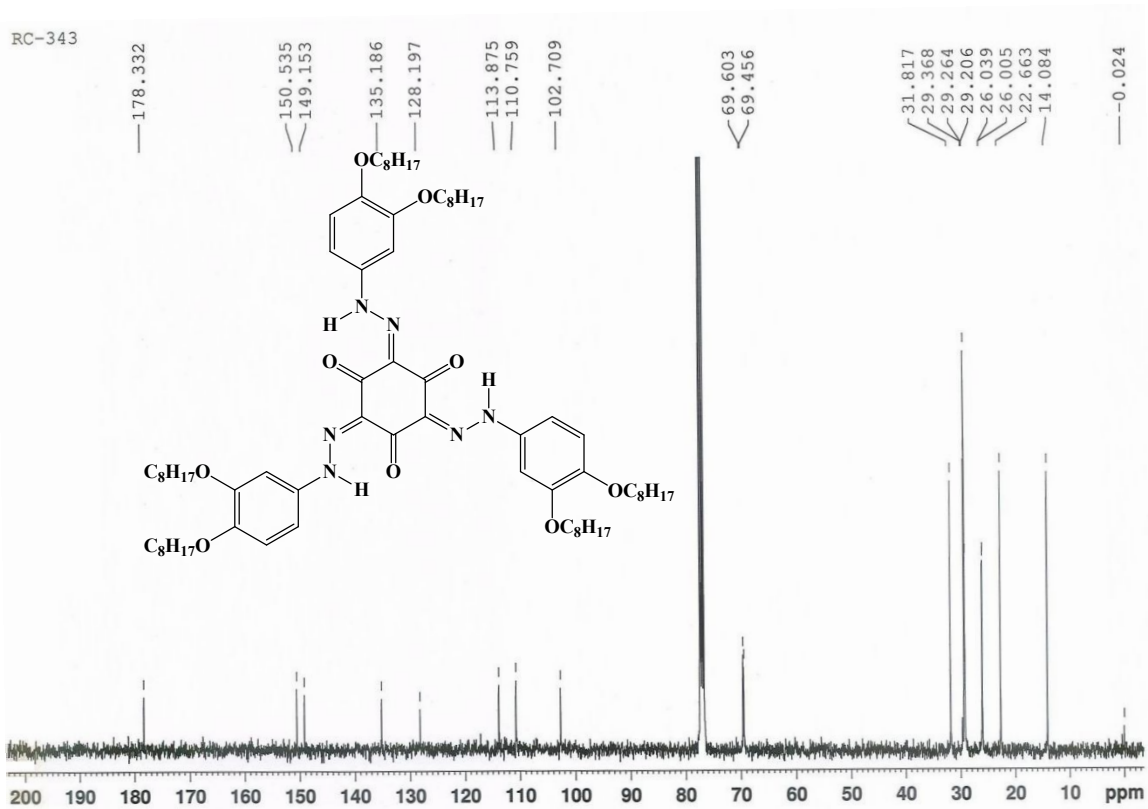

**Figure S18.** <sup>13</sup>C NMR spectrum of compound THN(6)8 (100MHz; CDCl<sub>3</sub>)

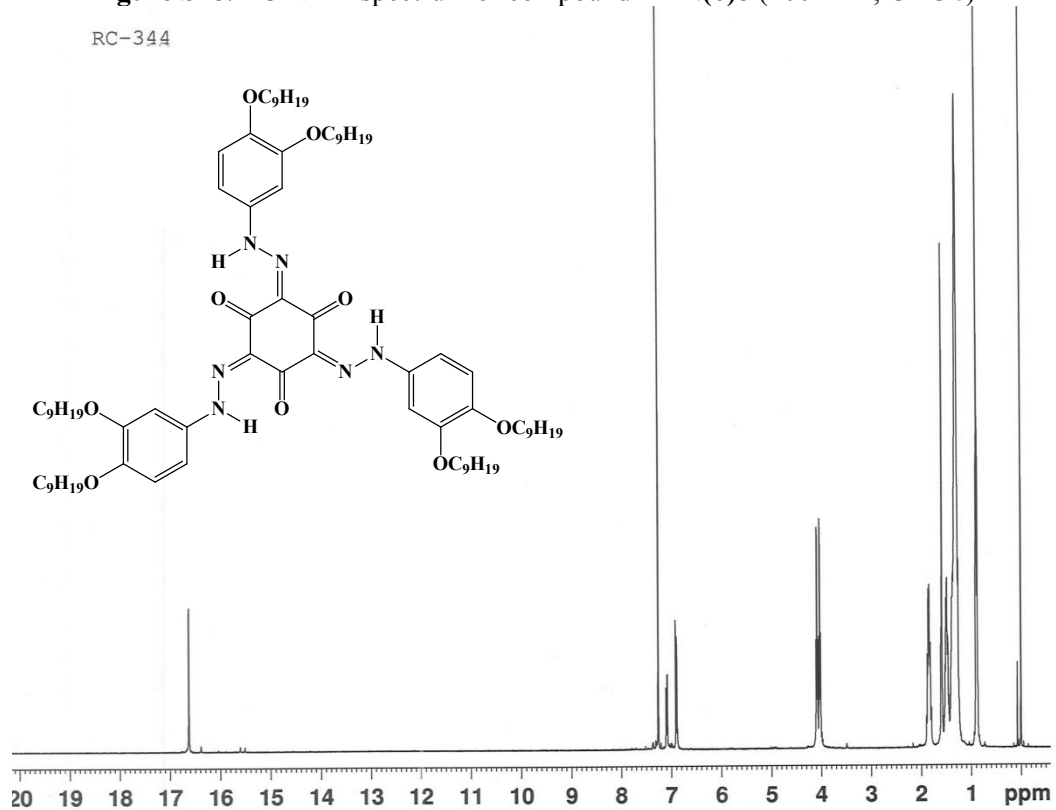

**Figure S19.** <sup>1</sup>H NMR spectrum of compound THN(6)9 (400MHz; CDCl<sub>3</sub>)

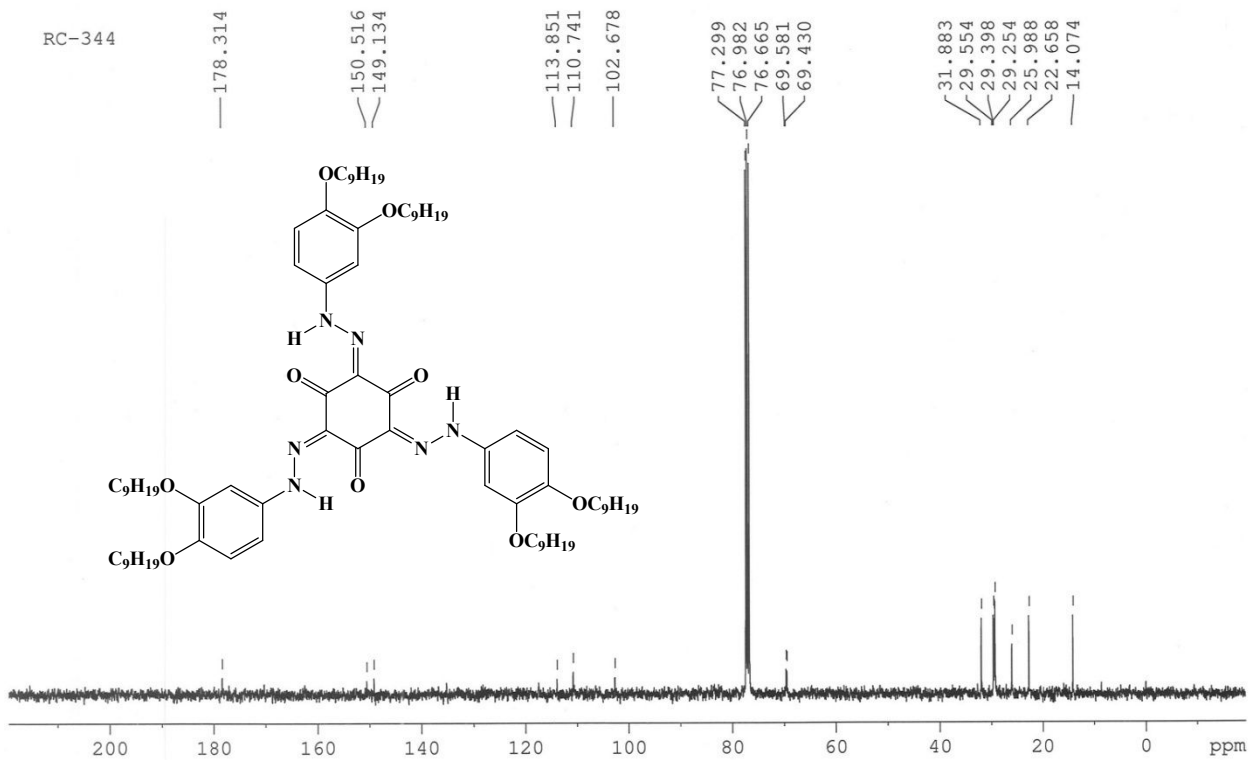

Figure S20.  $^{13}\text{C}$  NMR spectrum of compound THN(6)9 (100 MHz;  $\text{CDCl}_3$ )

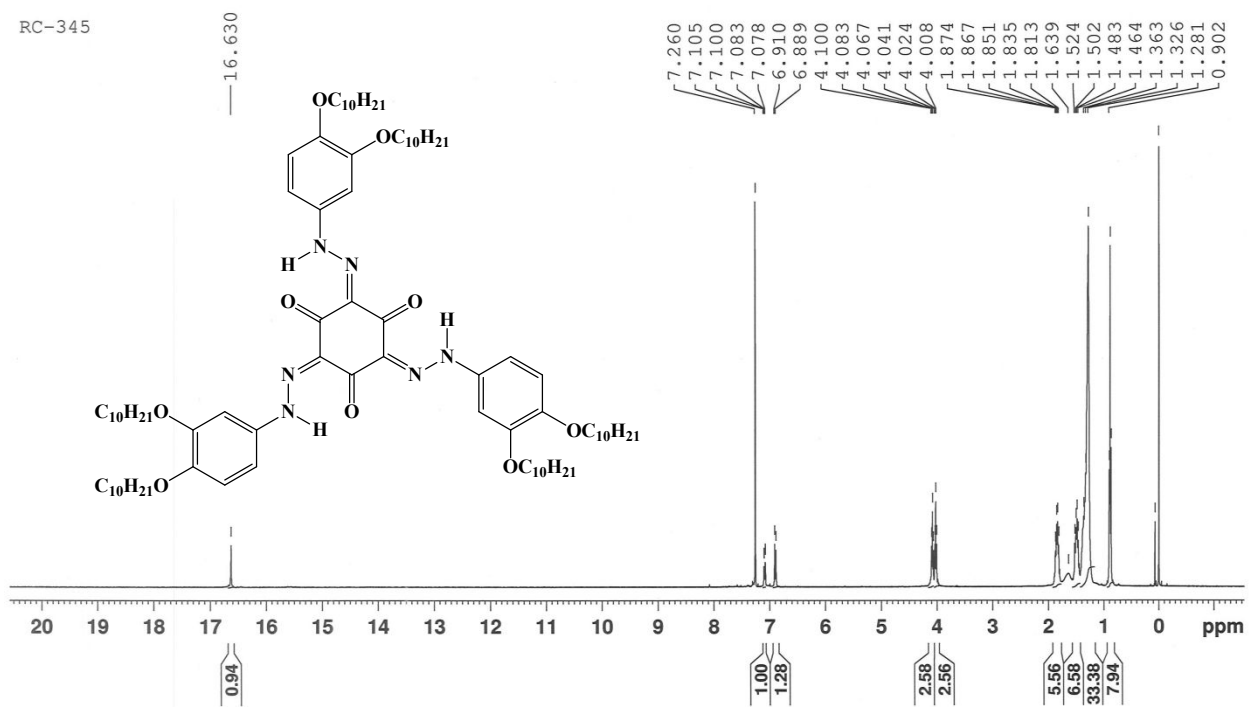

Figure S21.  $^1\text{H}$  NMR spectrum of compound THN(6)10 (400 MHz;  $\text{CDCl}_3$ )

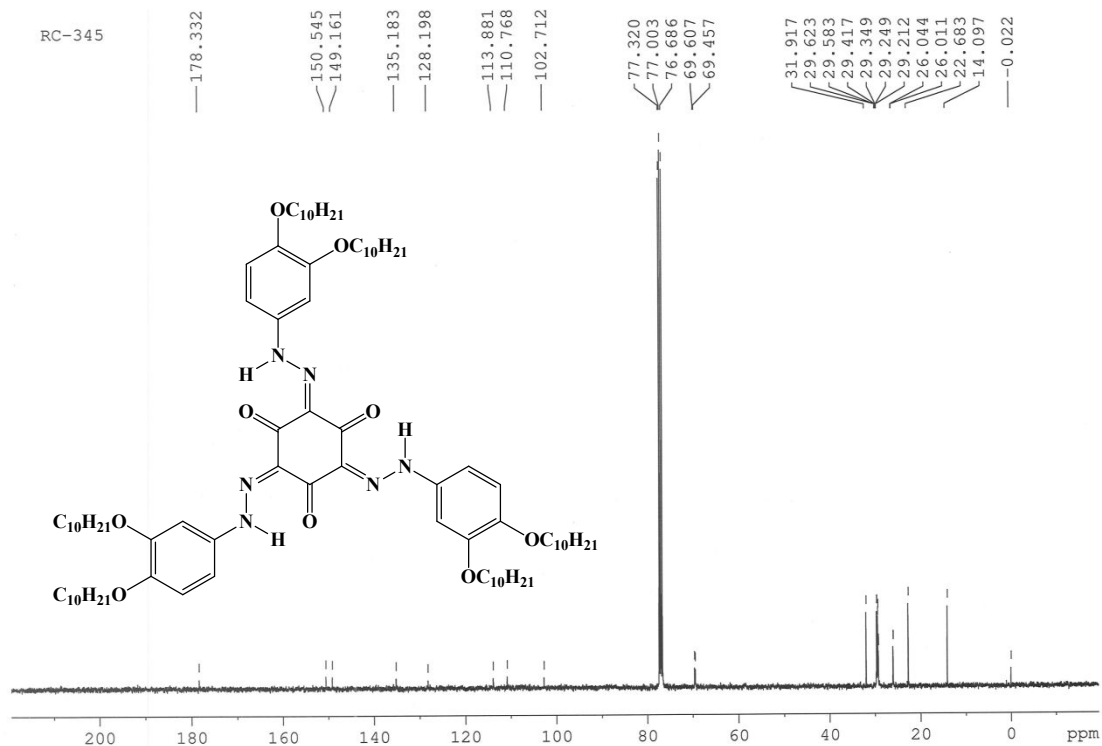

Figure S22.  $^{13}\text{C}$  NMR spectrum of compound THN(6)10 (100 MHz;  $\text{CDCl}_3$ )

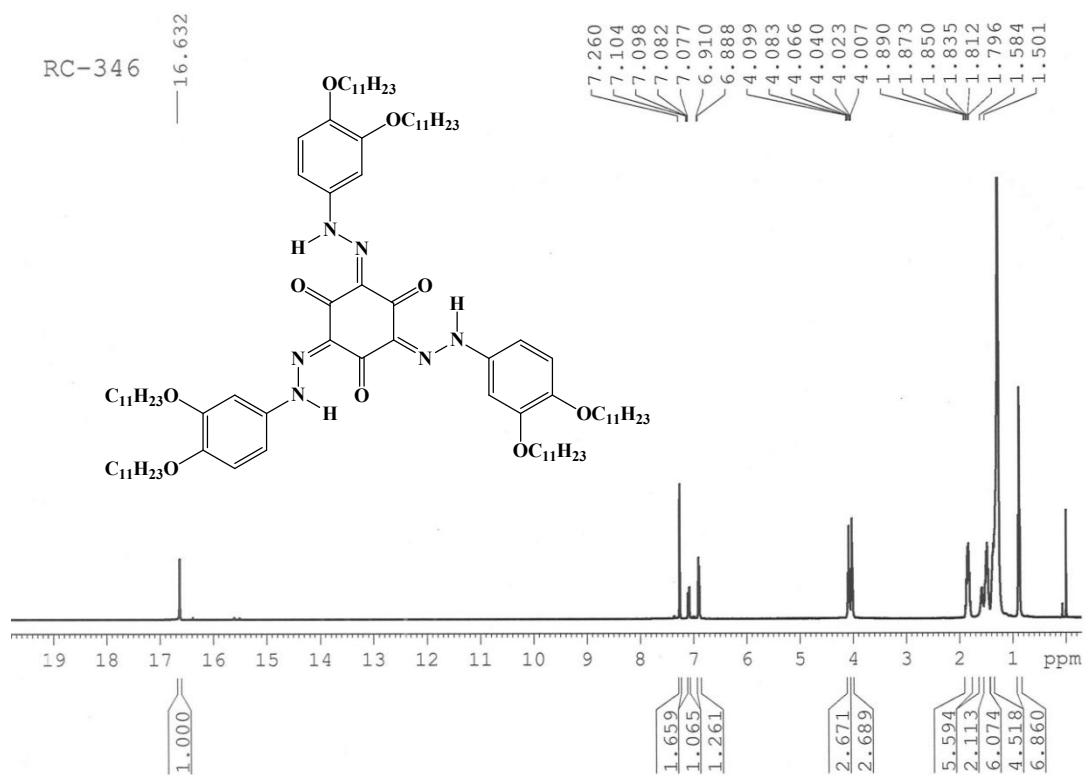

Figure S23.  $^1\text{H}$  NMR spectrum of compound THN(6)11 (400 MHz;  $\text{CDCl}_3$ )

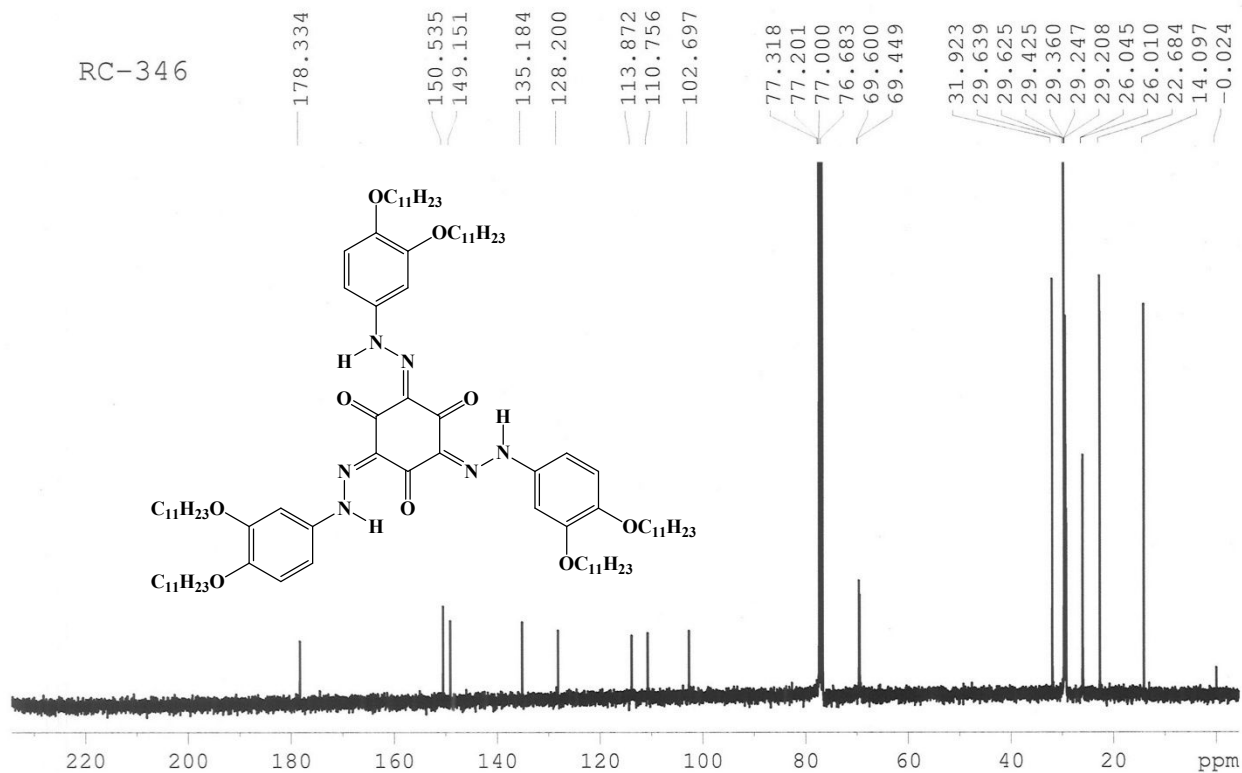

Figure S24. <sup>13</sup>C NMR spectrum of compound THN(6)11 (100MHz; CDCl<sub>3</sub>)

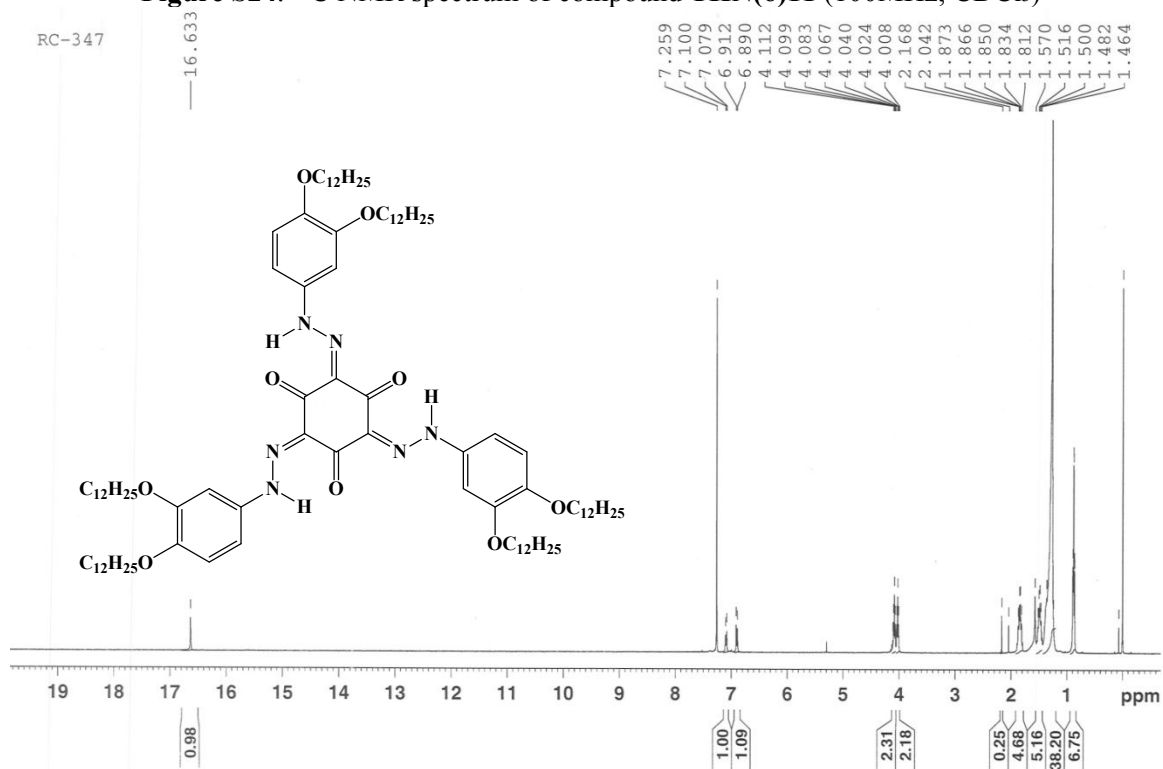

Figure S25. <sup>1</sup>H NMR spectrum of compound THN(6)12 (400MHz; CDCl<sub>3</sub>)



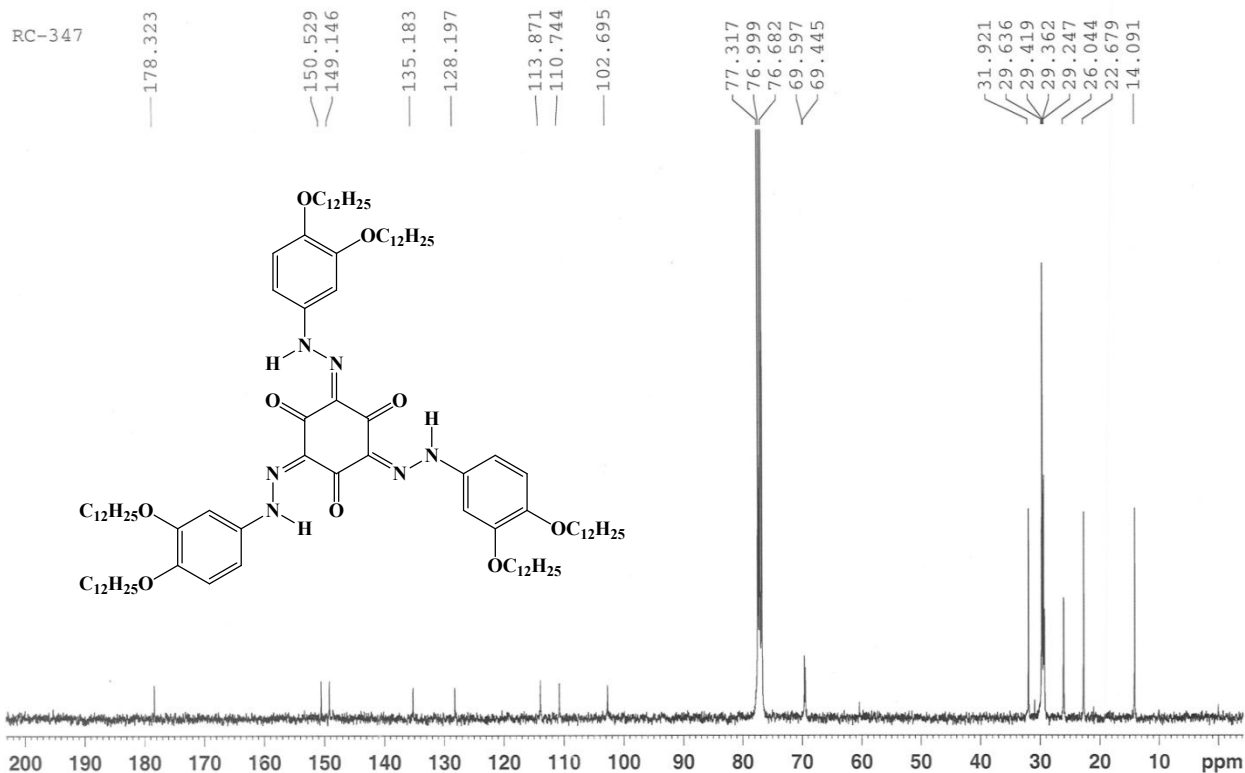

Figure S26. <sup>13</sup>C NMR spectrum of compound THN(6)12 (100MHz; CDCl<sub>3</sub>)

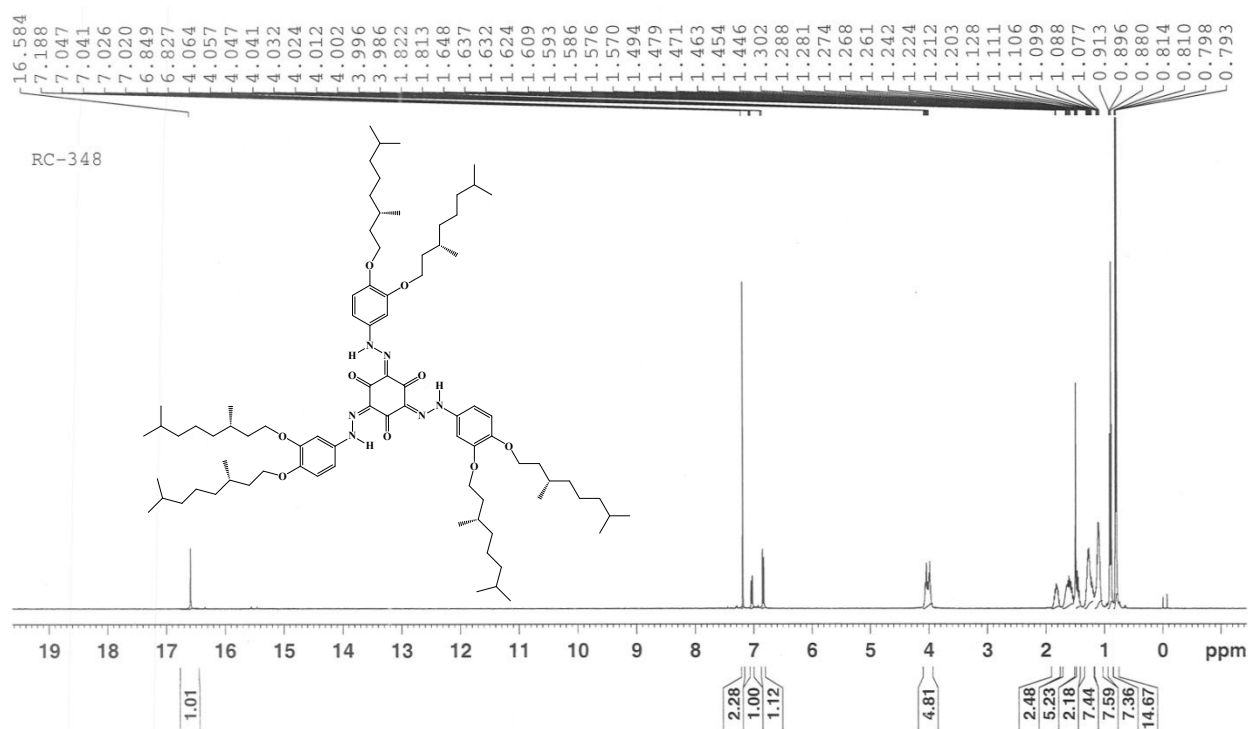

Figure S27. <sup>1</sup>H NMR spectrum of compound THN(6)10B (400 MHz; CDCl<sub>3</sub>)

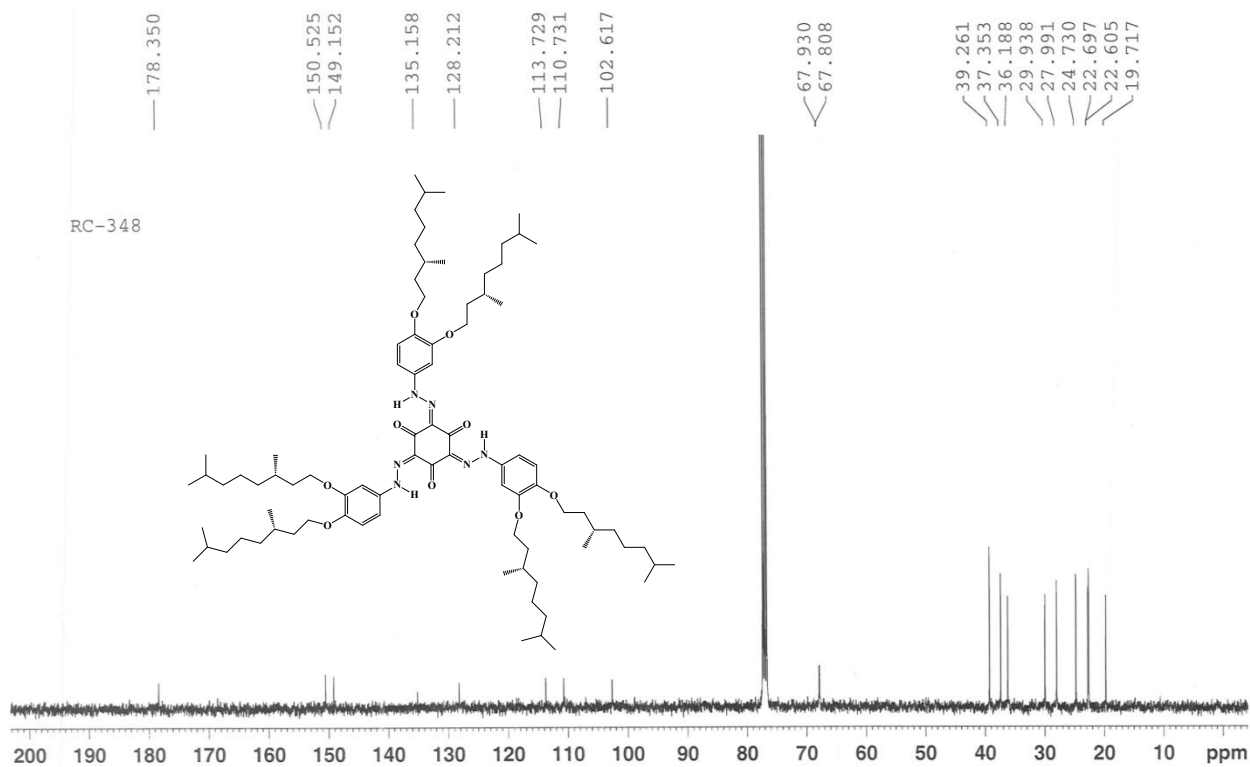

**Figure S28.**  $^{13}\text{C}$  NMR spectrum of compound **THN(6)10B** (100 MHz;  $\text{CDCl}_3$ )

RC-311

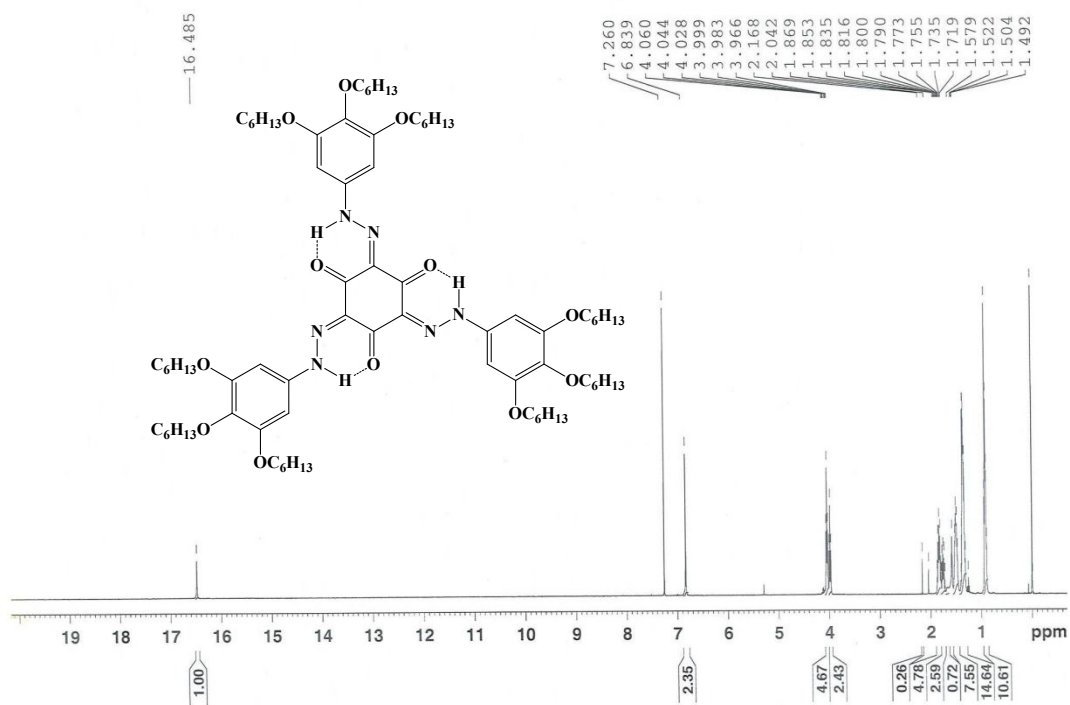

**Figure S29.**  $^1\text{H}$  NMR spectrum of compound **THN(9)6** (400MHz;  $\text{CDCl}_3$ )



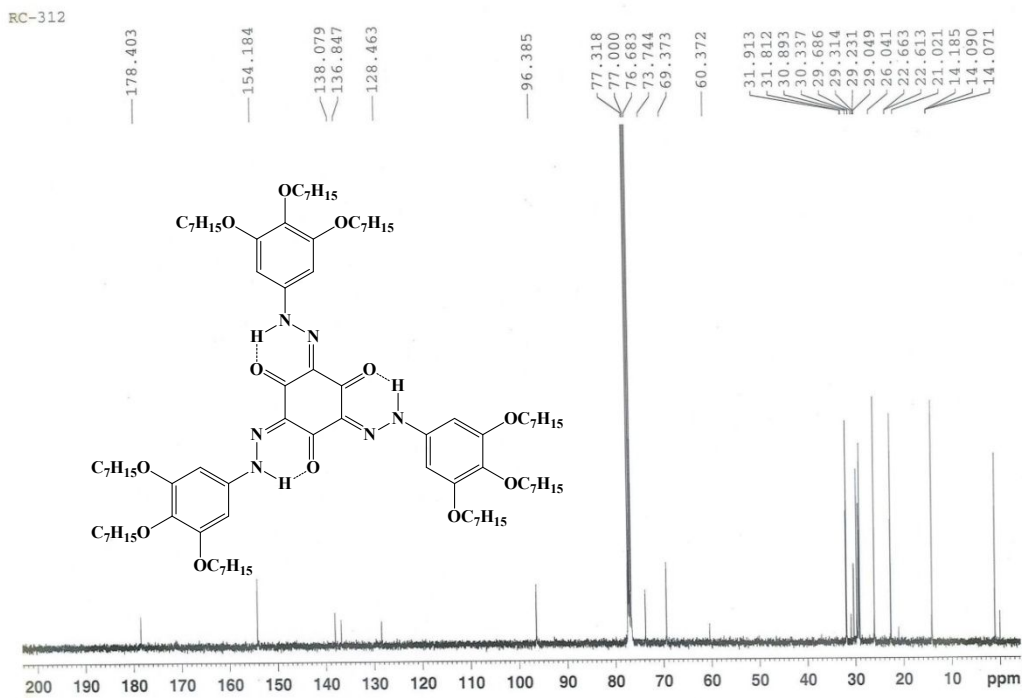

Figure S32.  $^{13}\text{C}$  NMR spectrum of compound THN(9)7 (100MHz;  $\text{CDCl}_3$ )

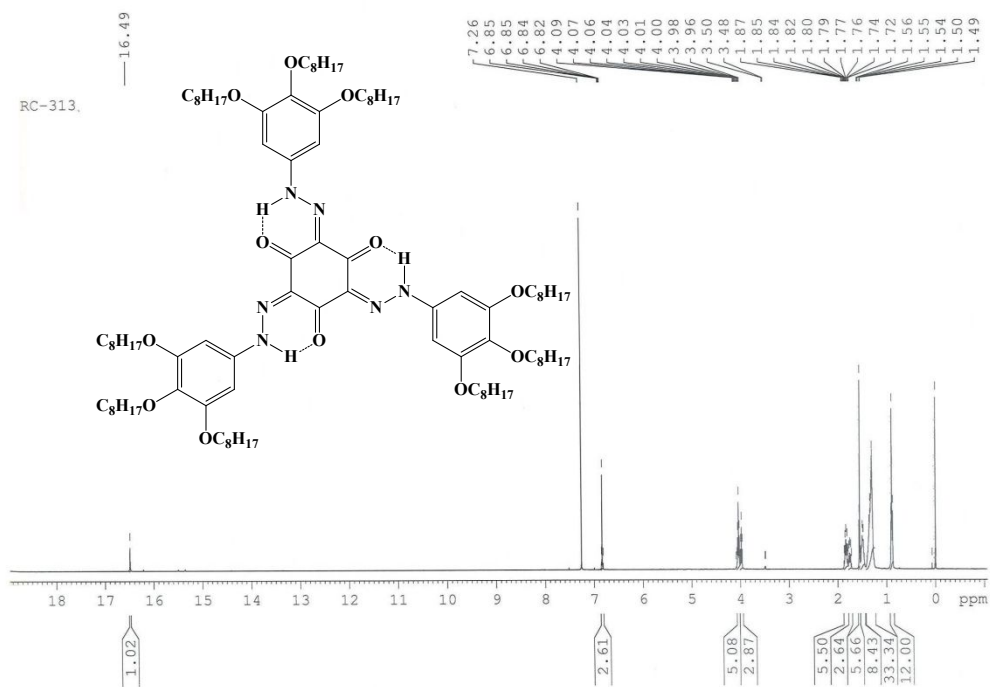

Figure S33.  $^1\text{H}$  NMR spectrum of compound THN(9)8 (400MHz;  $\text{CDCl}_3$ )

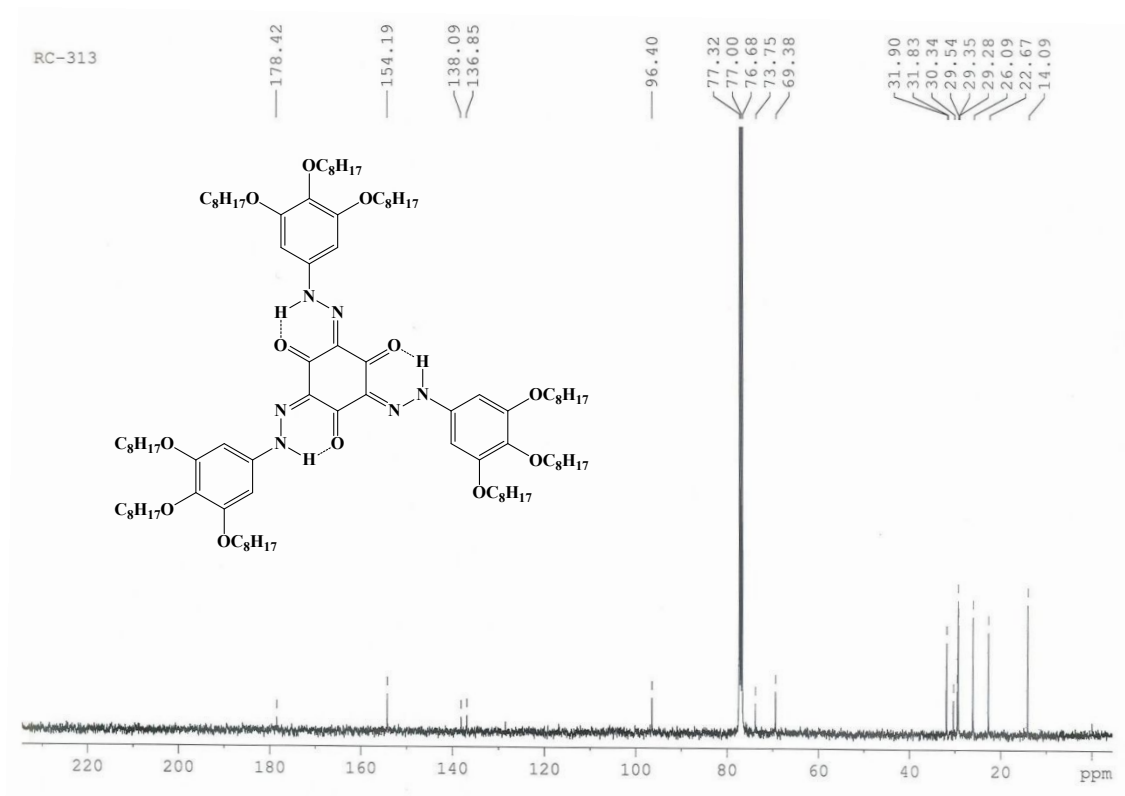

Figure S34.  $^{13}\text{C}$  NMR spectrum of compound THN(9)8 (100MHz;  $\text{CDCl}_3$ )

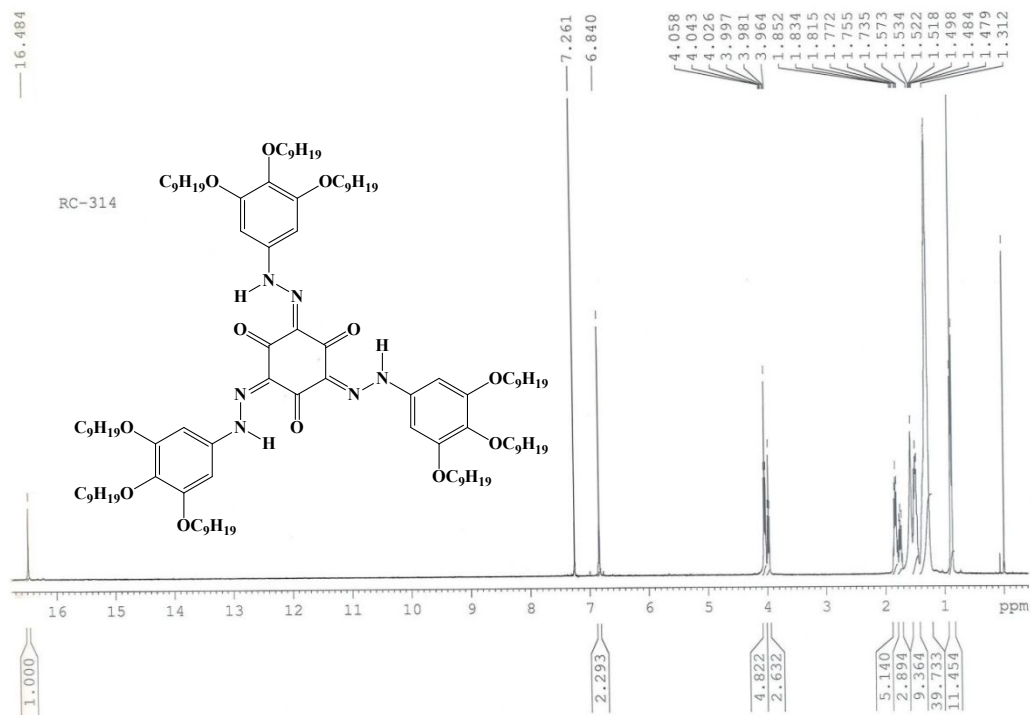

Figure S35.  $^1\text{H}$  NMR spectrum of compound THN(9)9 (400MHz;  $\text{CDCl}_3$ )

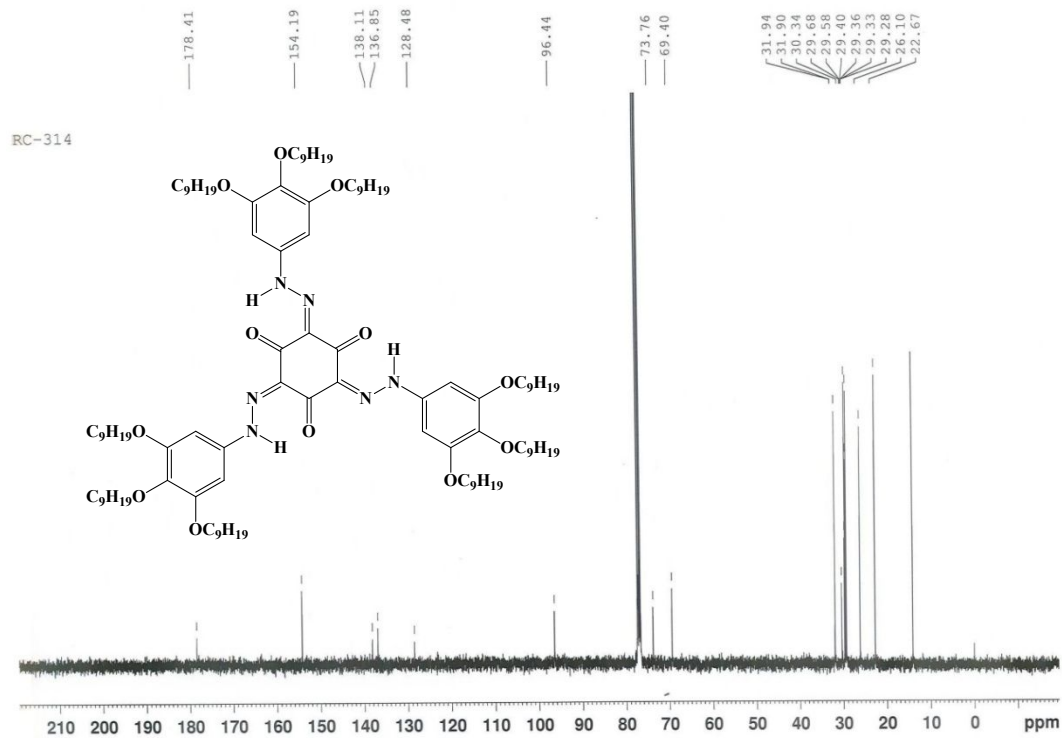

Figure S36. <sup>13</sup>C NMR spectrum of compound THN(9)9 (100MHz; CDCl<sub>3</sub>)

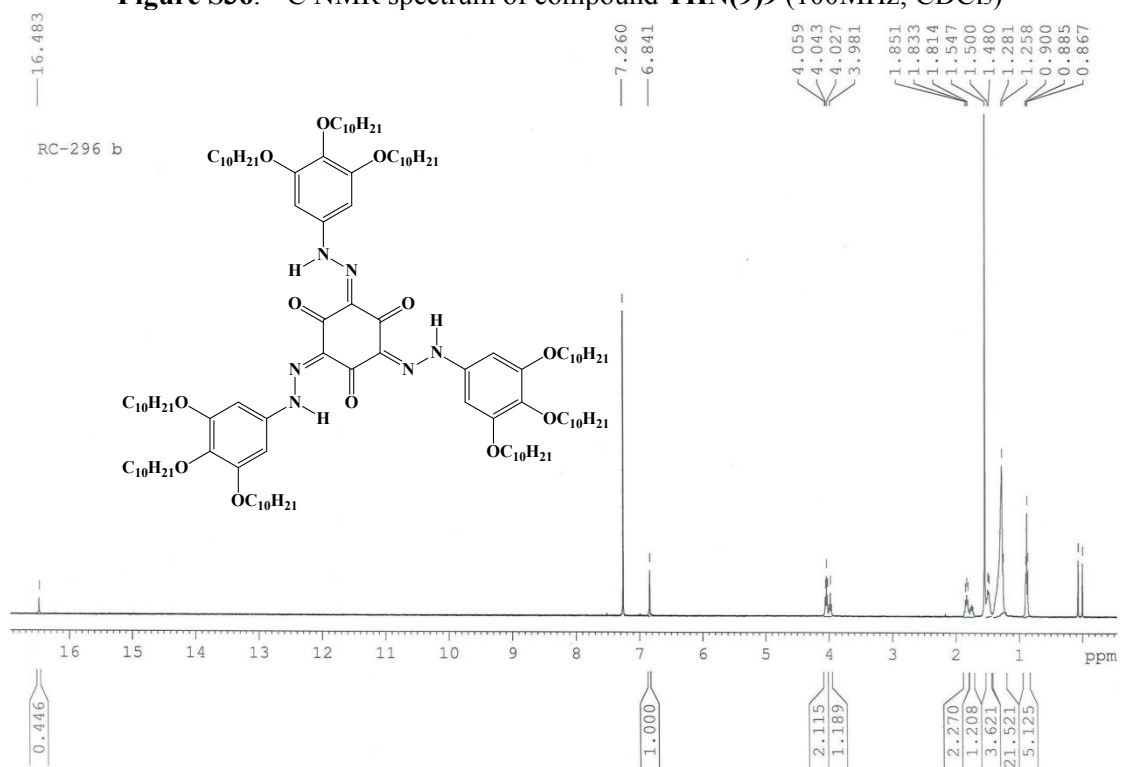

Figure S37. <sup>1</sup>H NMR spectrum of compound THN(9)10 (400MHz; CDCl<sub>3</sub>)

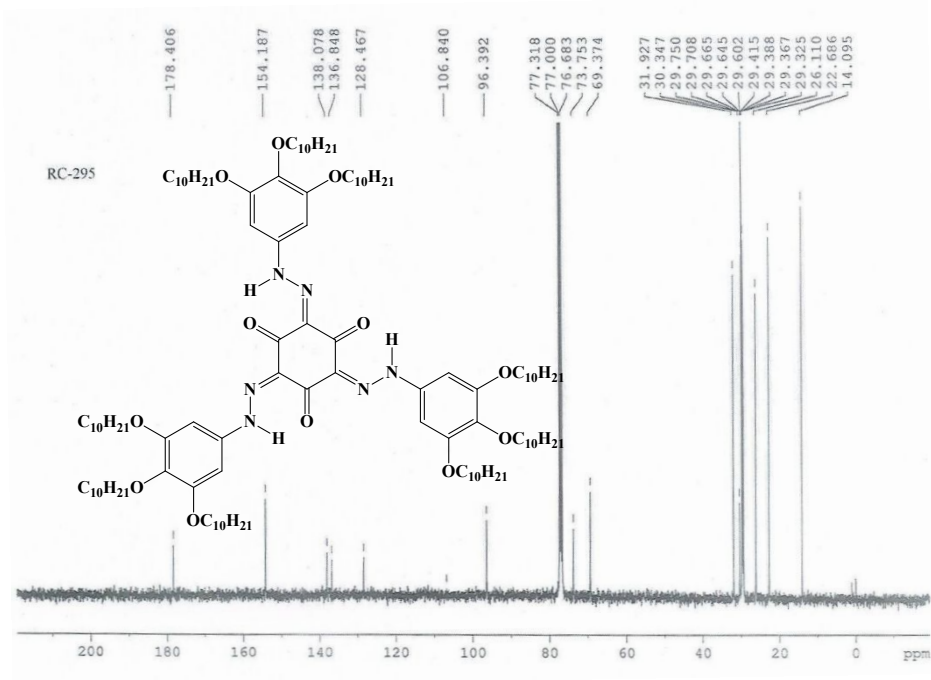

Figure S38.  $^{13}\text{C}$  NMR spectrum of compound **THN(9)10** (100MHz;  $\text{CDCl}_3$ )

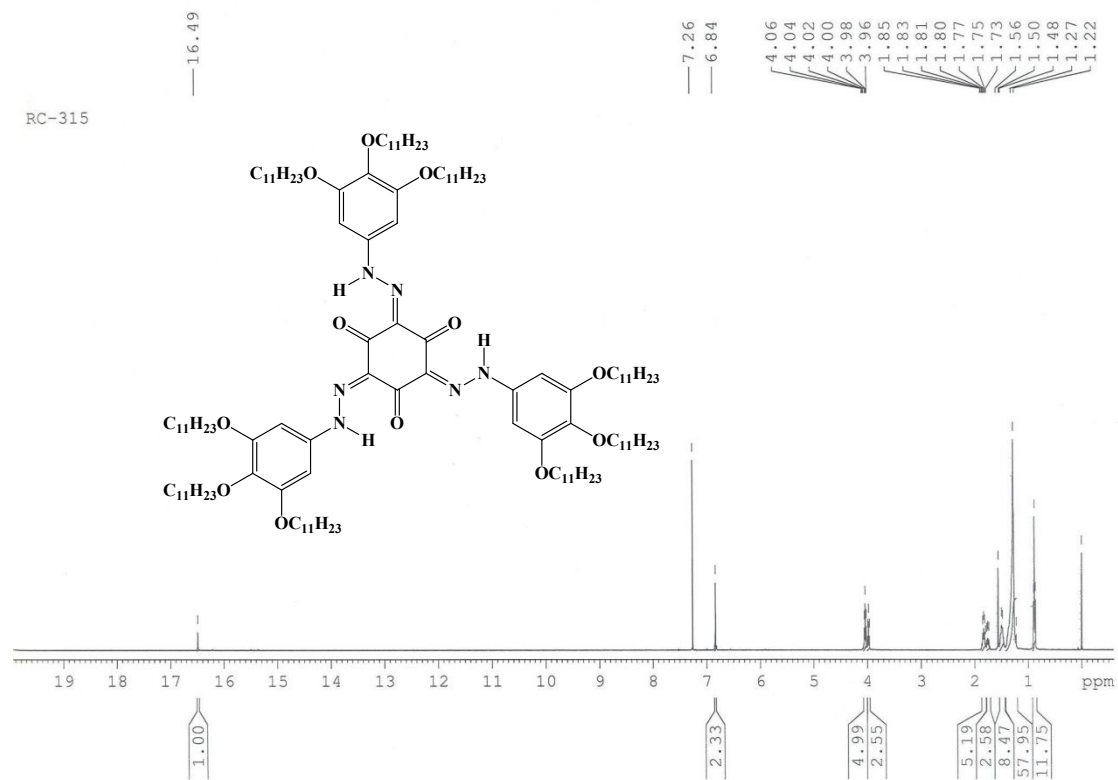

Figure S39.  $^1\text{H}$  NMR spectrum of compound **THN(9)11** (400MHz;  $\text{CDCl}_3$ )

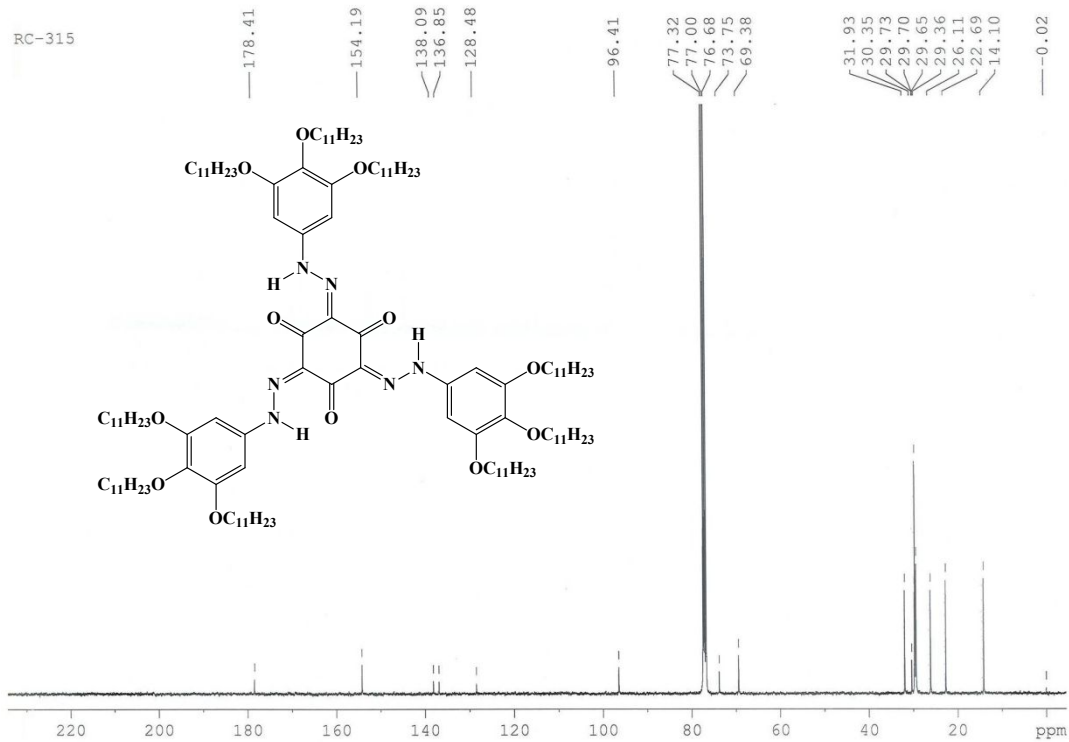

Figure S40.  $^{13}C$  NMR spectrum of compound THN(9)11 (100MHz;  $CDCl_3$ )

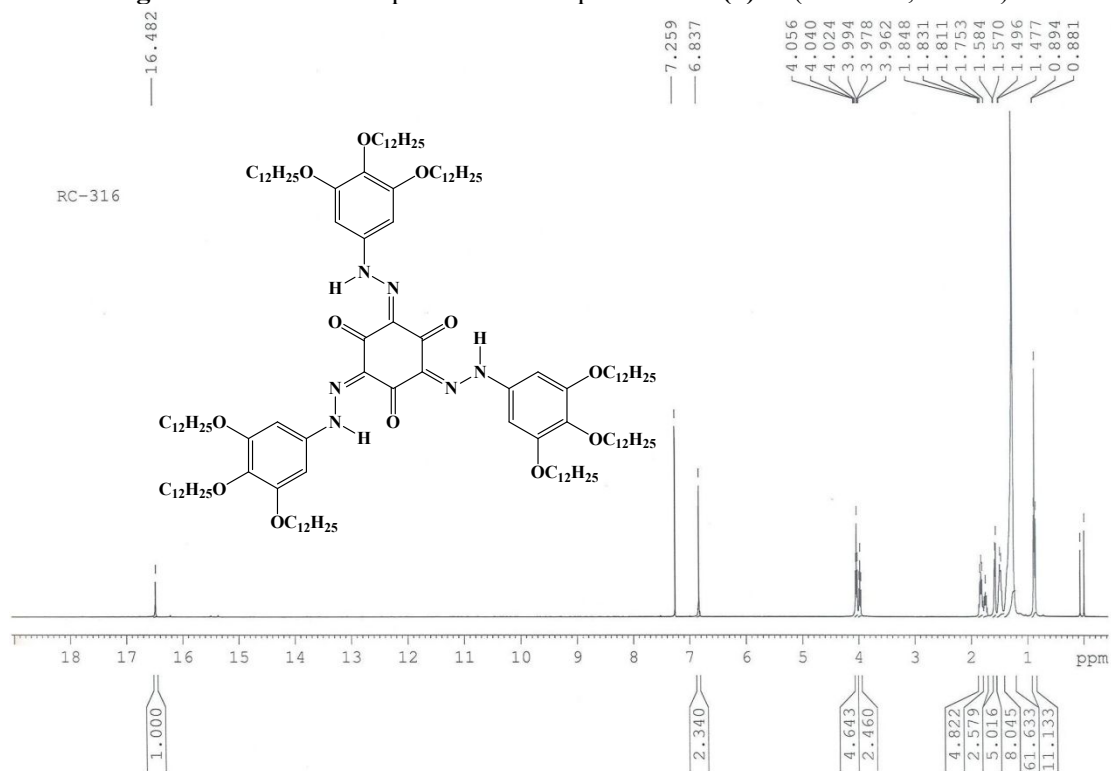

Figure S41.  $^1H$  NMR spectrum of compound THN(9)12 (400MHz;  $CDCl_3$ )



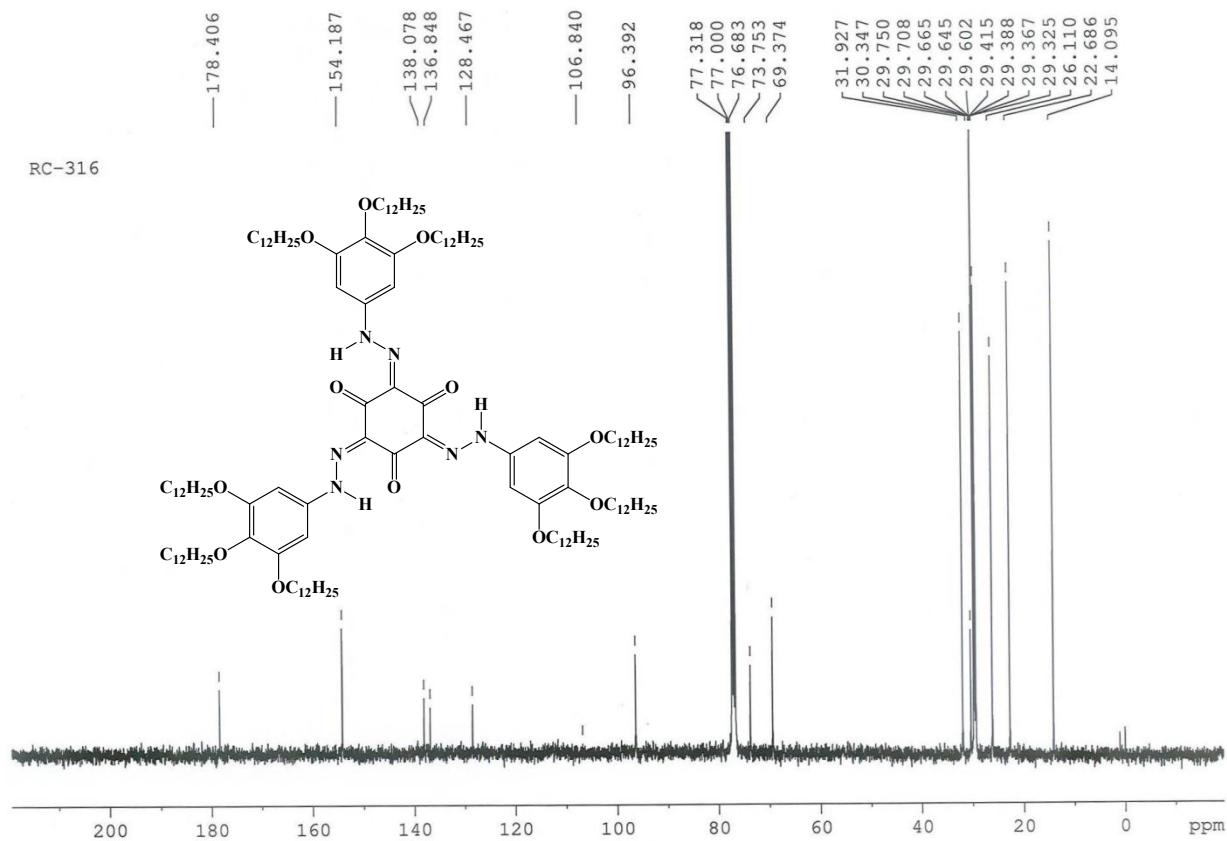

Figure S42.  $^{13}C$  NMR spectrum of compound THN(9)12 (100MHz;  $CDCl_3$ )

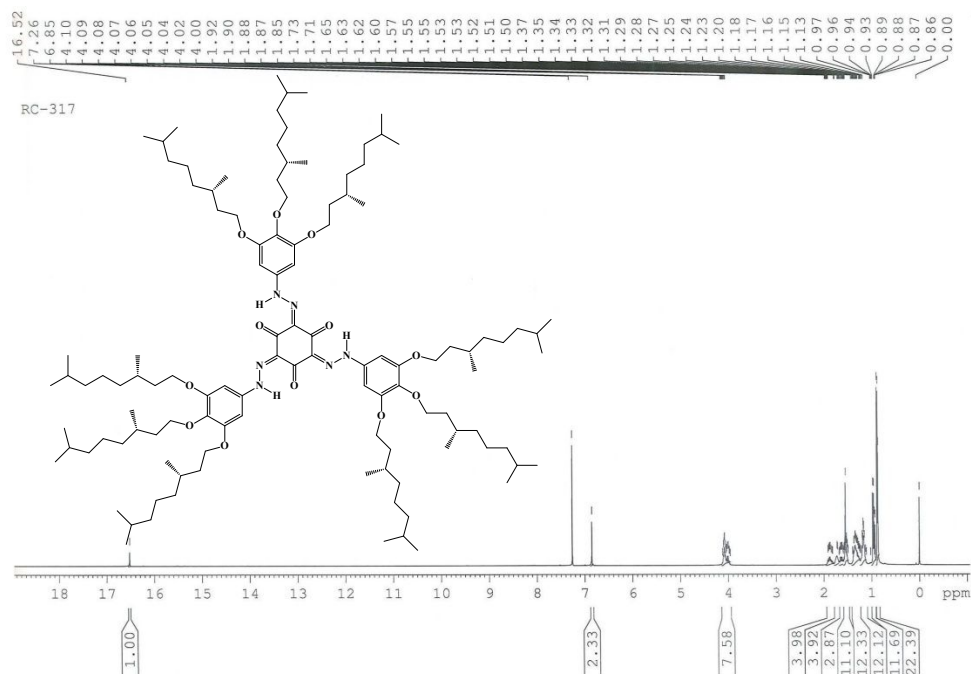

Figure S43.  $^1H$  NMR spectrum of compound THN(9)10B (400 MHz;  $CDCl_3$ )

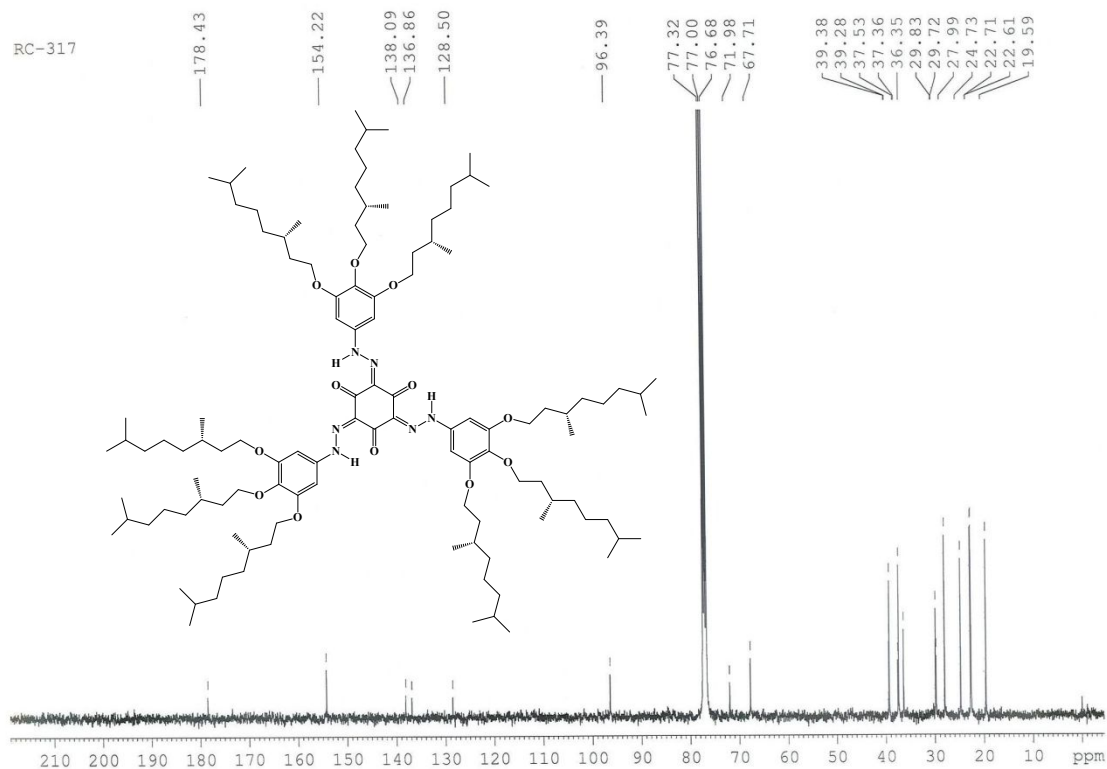

**Figure S44.**  $^{13}\text{C}$  NMR spectrum of compound **THN(9)10B** (100 MHz;  $\text{CDCl}_3$ )

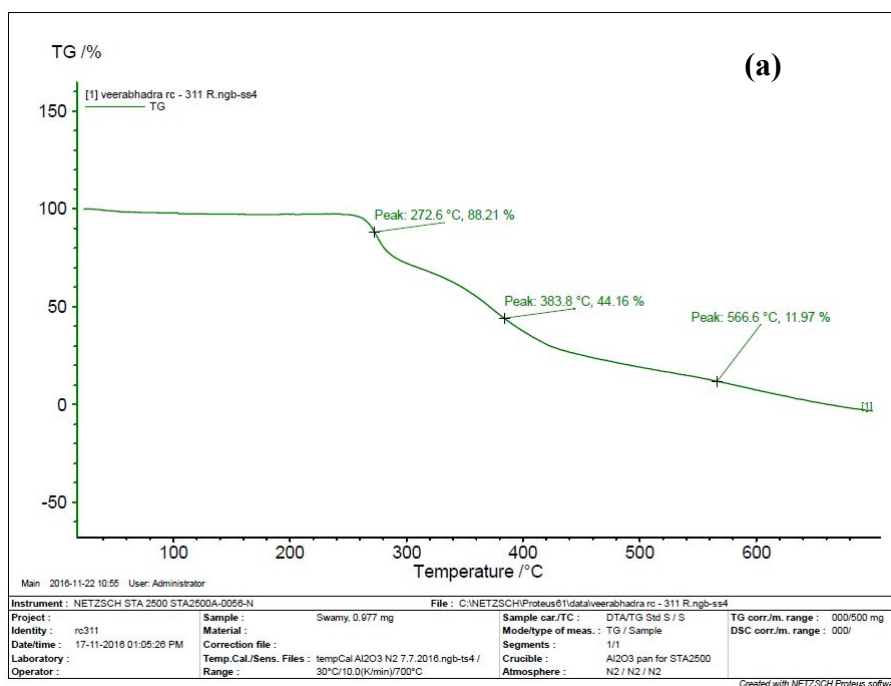

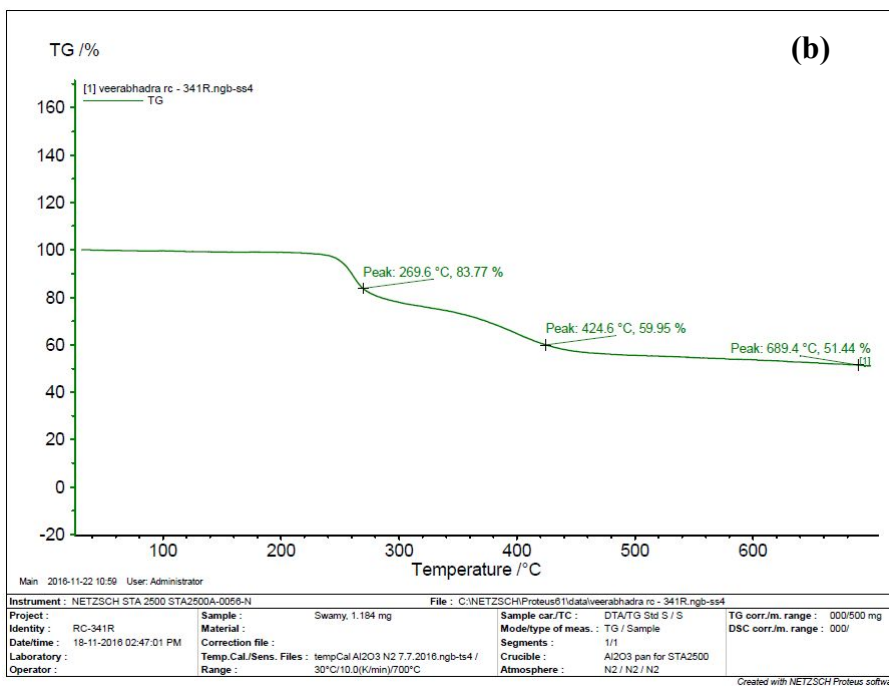

**Figure S45.** TGA graphs of compounds THN(6)6 (a) and THN(9)6 (b)

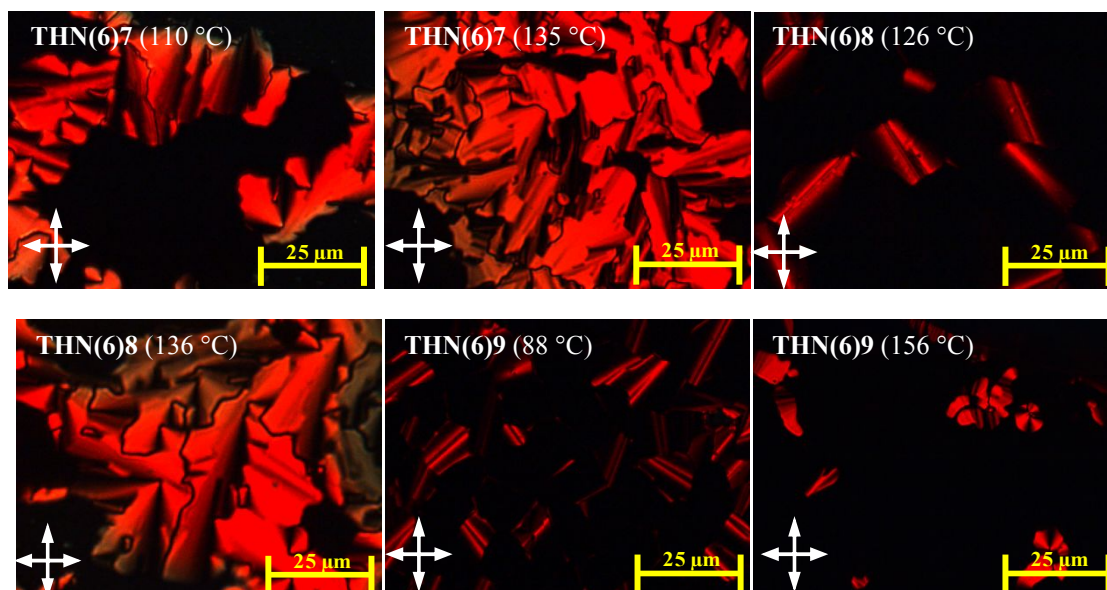

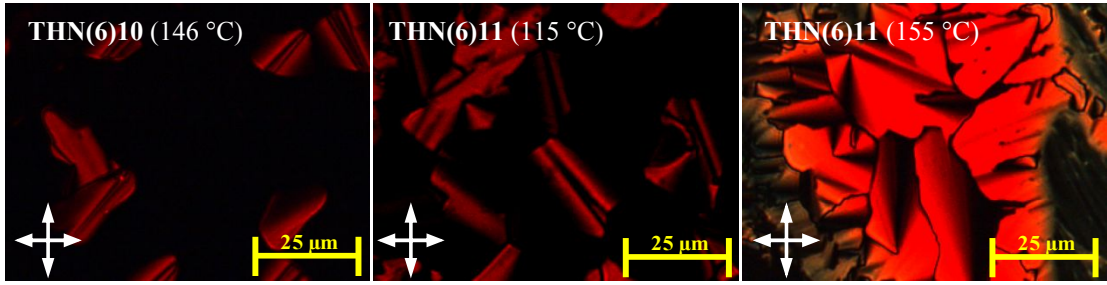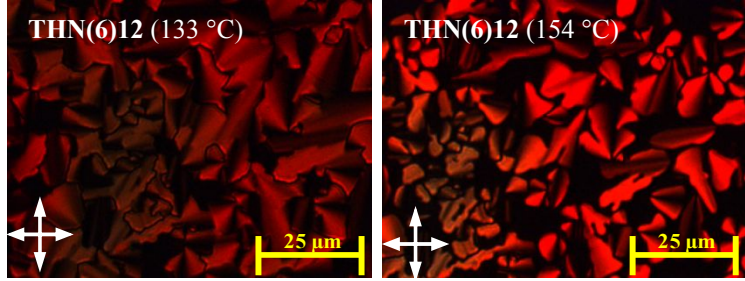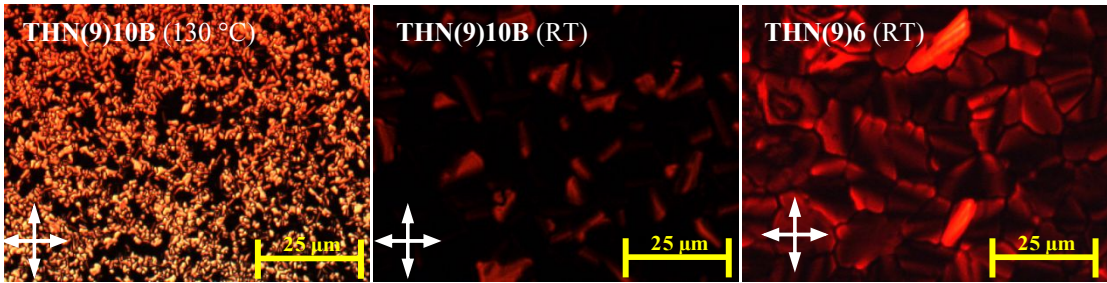

Continued.....

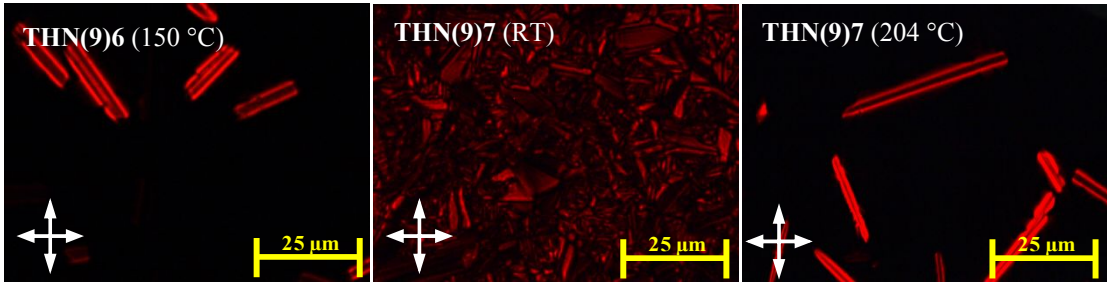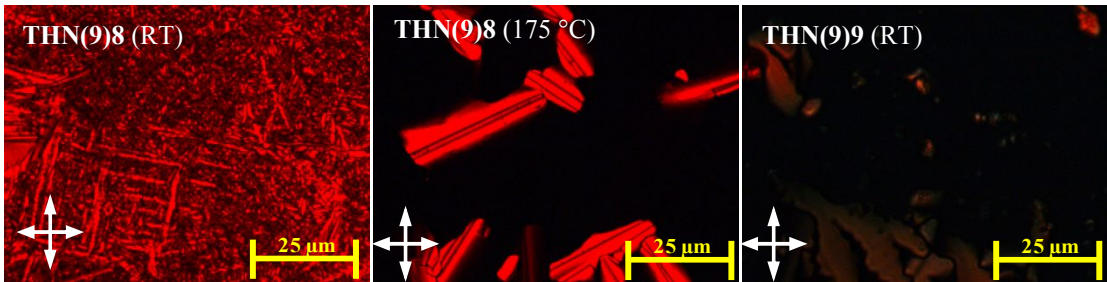



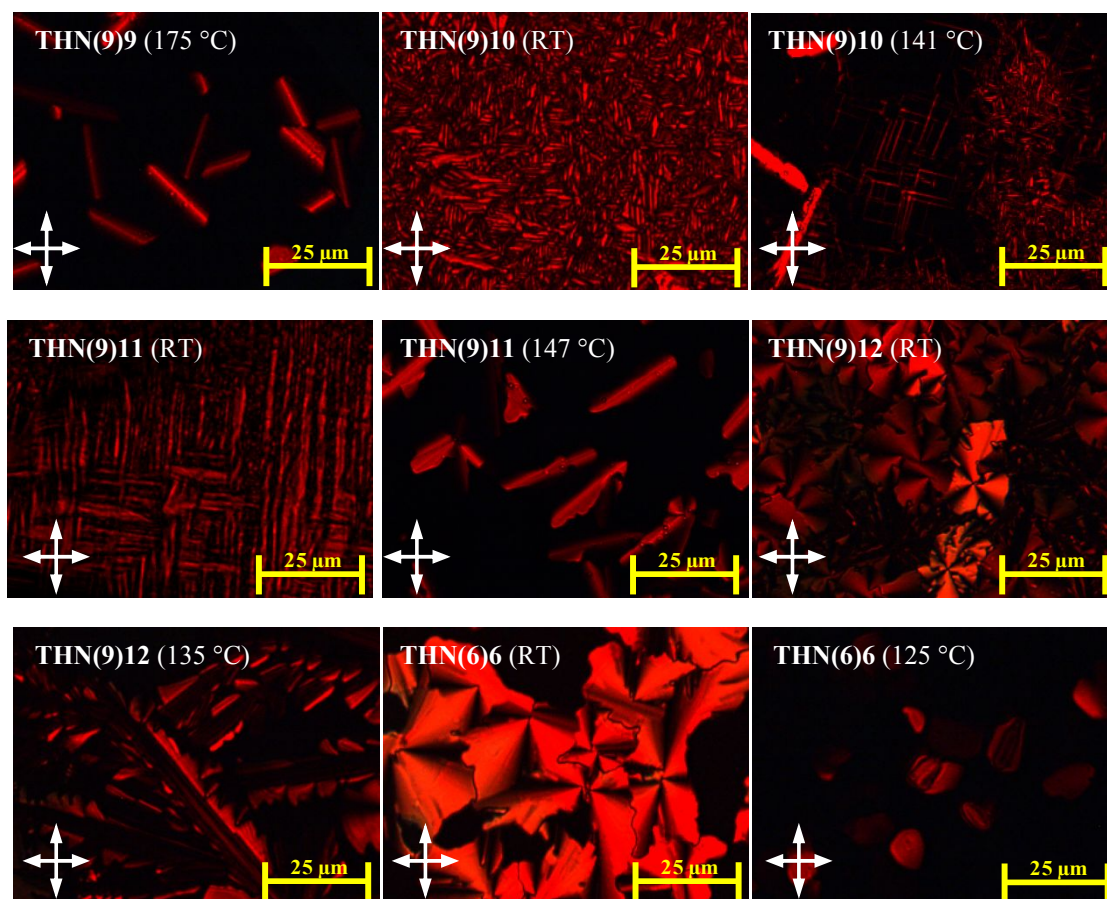

**Figure S46.** Photomicrographs of the optical textures observed for the Col phase exhibited by discogens of THN(6)*n* and THN(9)*n* series. RT = Room temperature (23-25 °C)

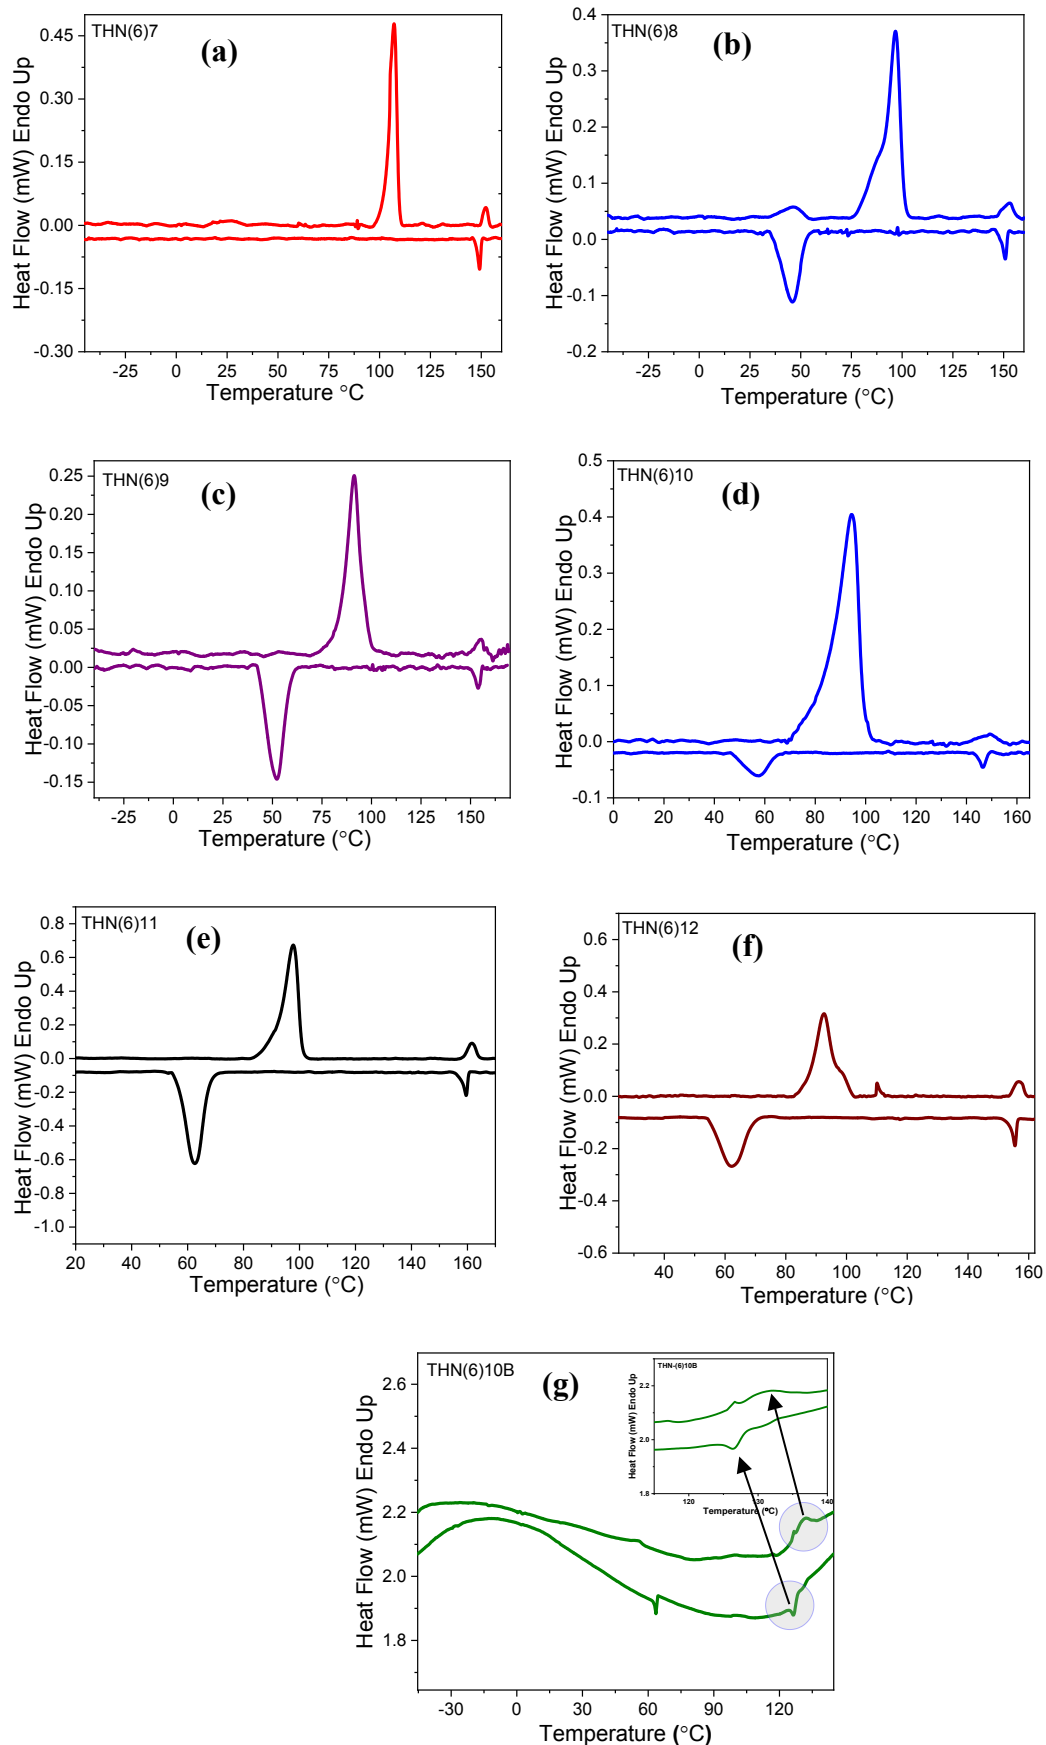

**Figure S47.** DSC thermograms obtained for discotics belonging to THN(6)*n* series during first heating (top trace) and subsequent cooling (bottom curve) cycles at a rate of 5°C/min.

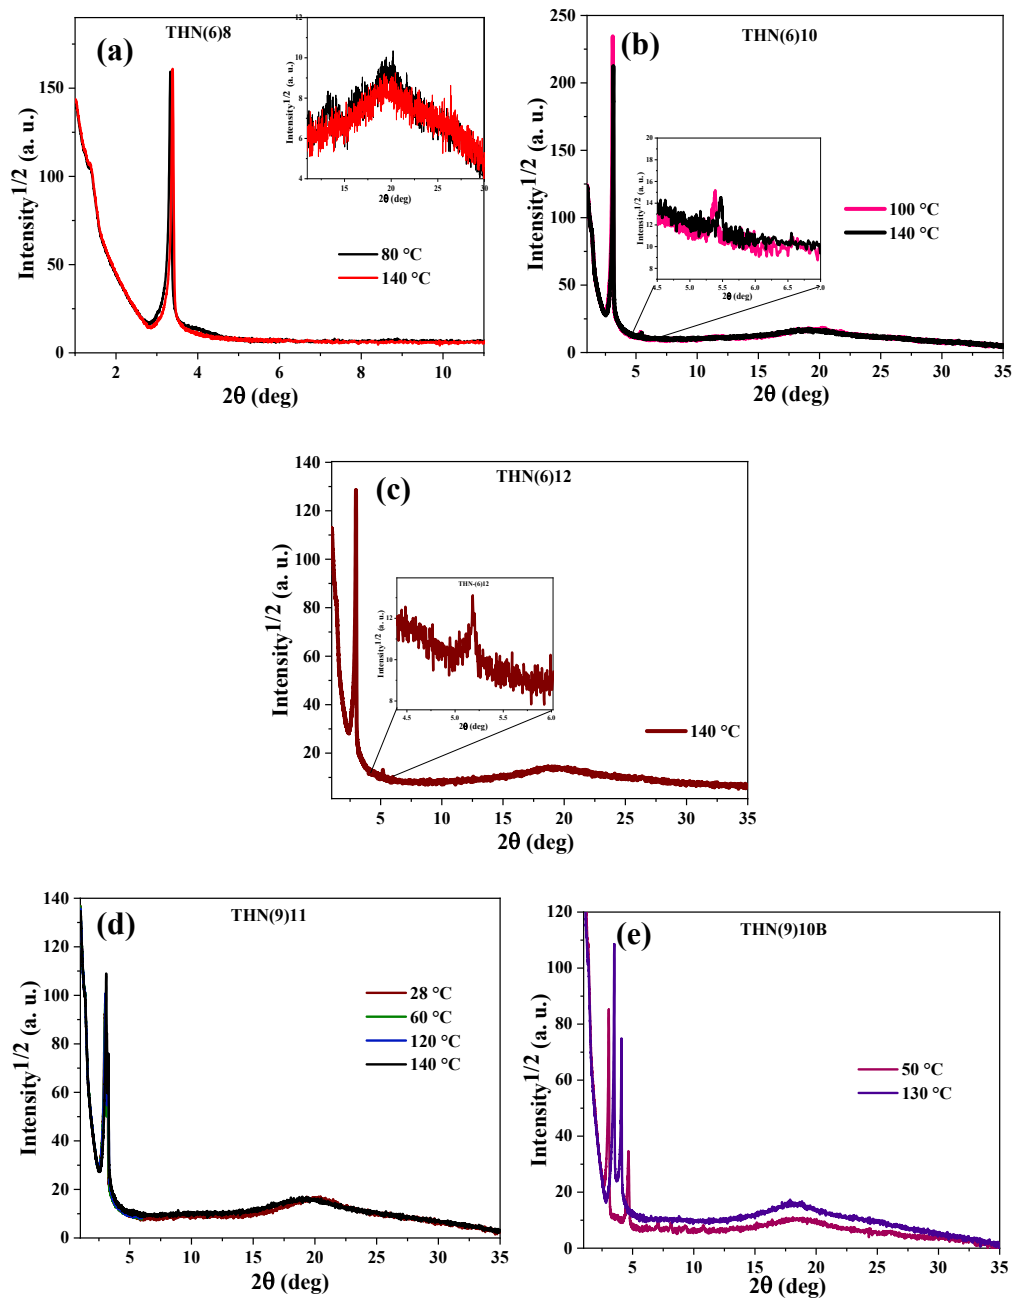

**Figure S48.** The 1D intensity vs  $2\theta$  profiles obtained for the Col phase of discogens THN(6)8 (a), THN(6)10(b), THN(6)12(c), THN(9)11(d) & THN(9)10B(e).

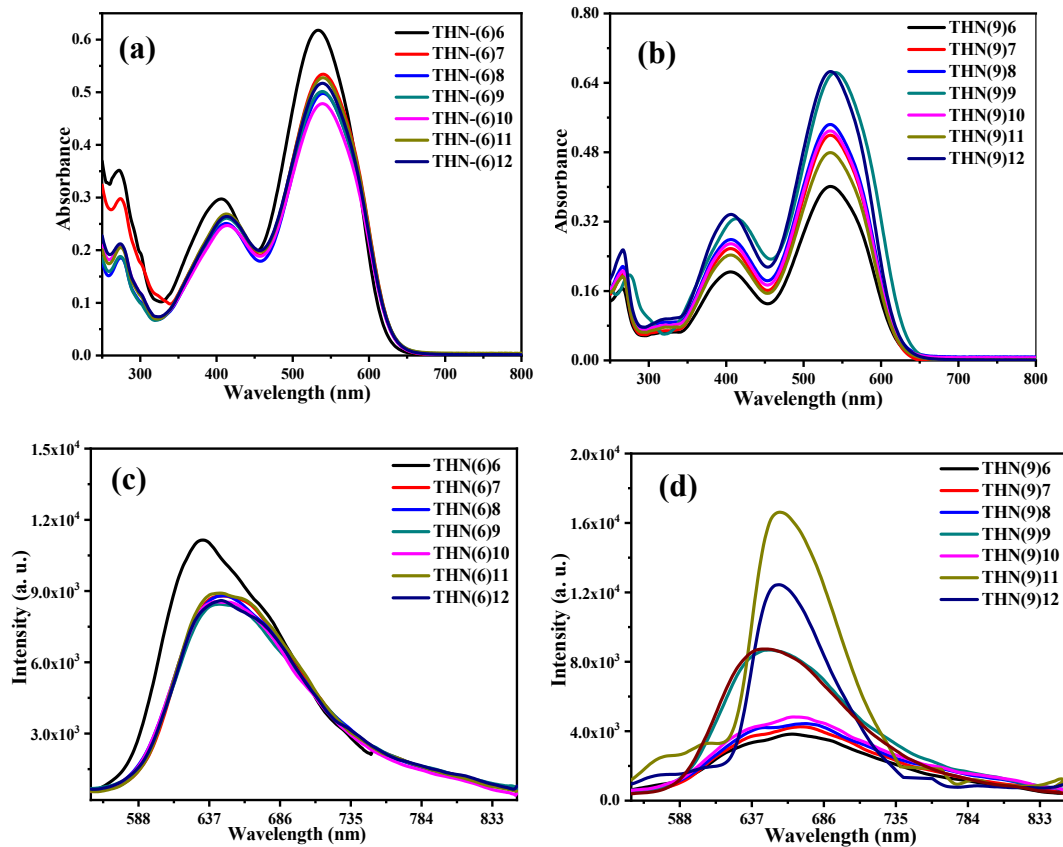

**Figure S49.** UV-Vis (a) & (b) and emission (c) & (d) spectra of discotic LCs belonging to **THN(6)n** and **THN(9)n** series in the dichloromethane (DCM) solution.

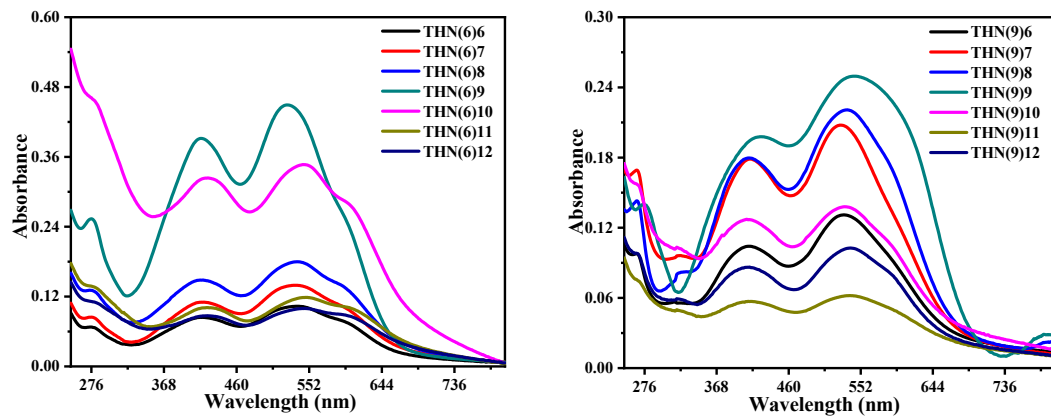



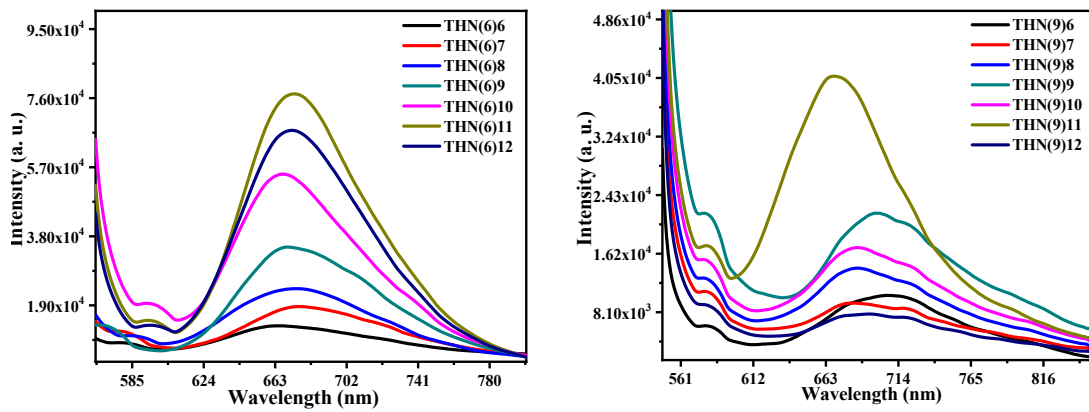

**Figure S50.** Solid state (thin film) absorption and emission spectra of **TNH(6)n** and **TNH(9)n** series of discotics.

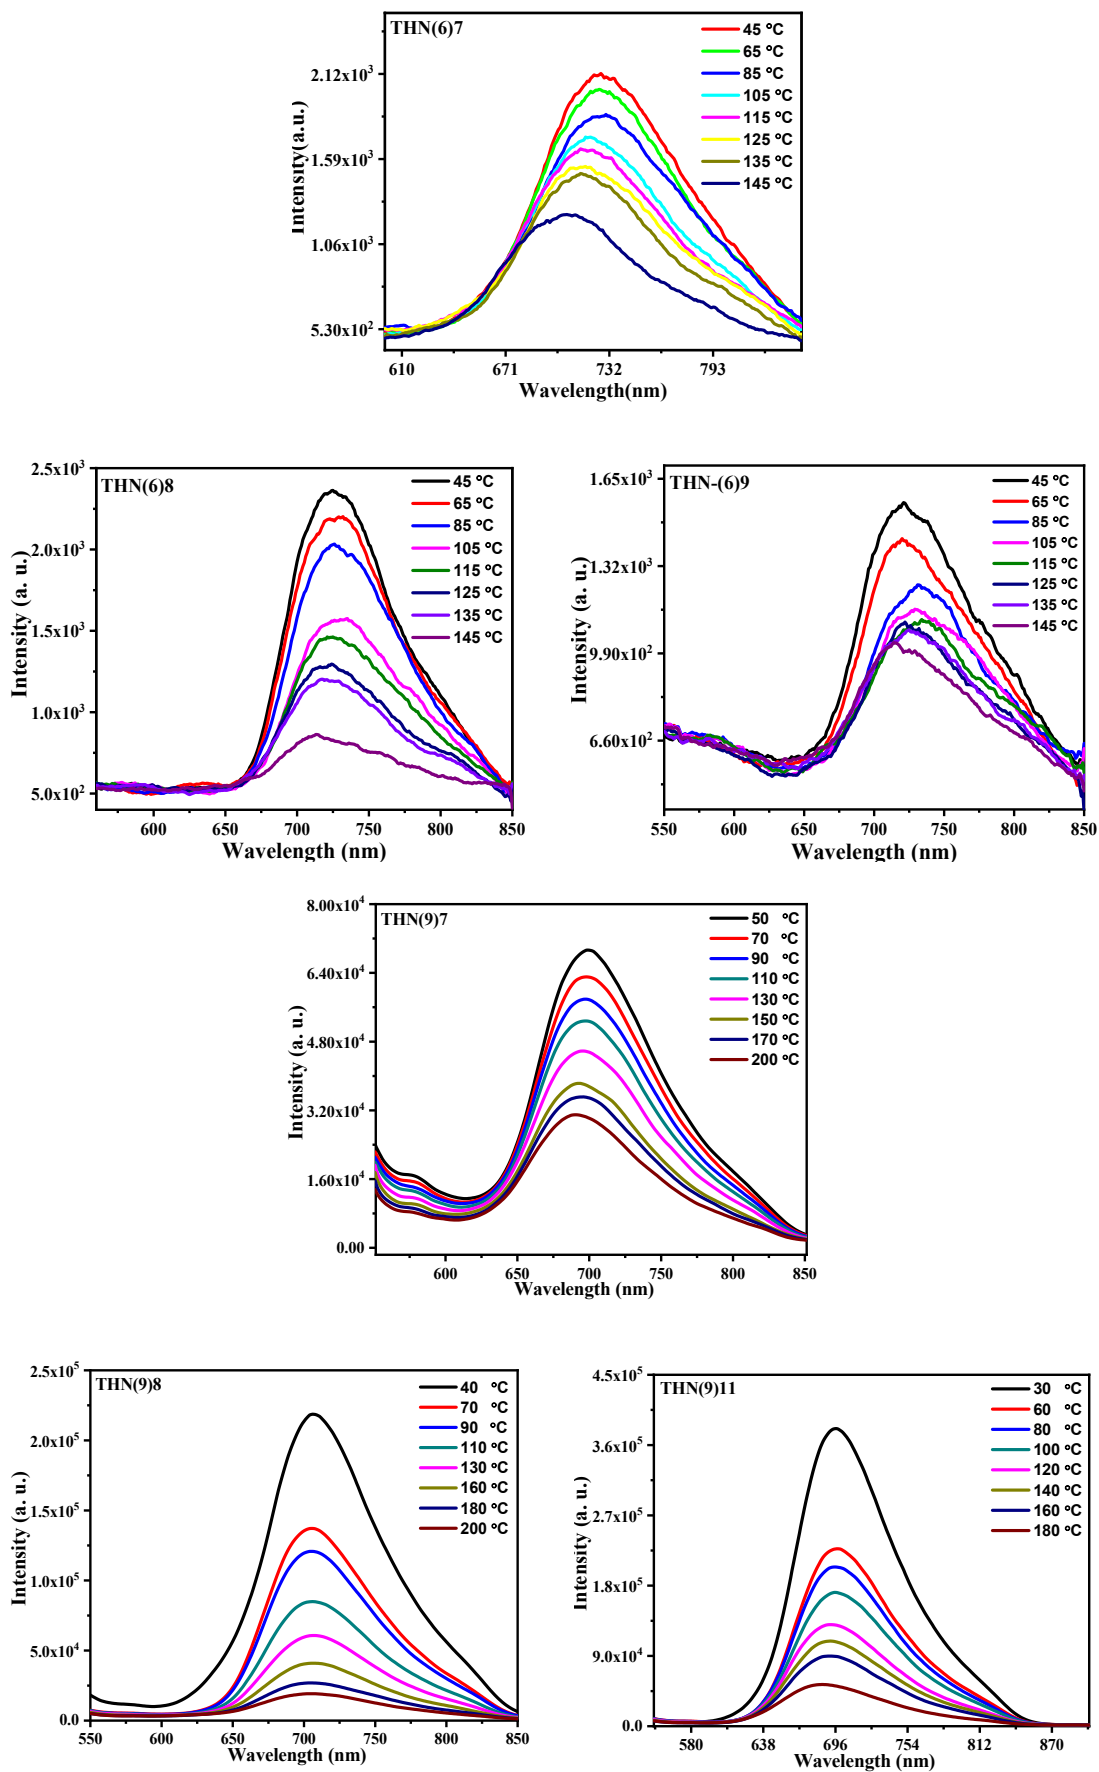

**Figure S51.** The emission spectra recorded as function of temperature for the Col phase of several representative discotics chosen from **TNH(6)n** and **TNH(9)n** series.

**Table S1.** Quantum yield of **THN(6)6** and **THN(9)6** discotics

| <b>Discotics</b>                                                                                                                                                                                                                                                                                                                                                      | <b>Quantum yield (%)</b> |
|-----------------------------------------------------------------------------------------------------------------------------------------------------------------------------------------------------------------------------------------------------------------------------------------------------------------------------------------------------------------------|--------------------------|
| <b>THN(6)6</b>                                                                                                                                                                                                                                                                                                                                                        | 4.5                      |
| <b>THN(9)6</b>                                                                                                                                                                                                                                                                                                                                                        | 9.8                      |
| Relative quantum yield technique adopted, <b>Rhodamine-B</b> dissolved in water was used as internal standard. The excitation wavelength of Rhodamine-B is 545 nm and emission wavelength is 586 nm. 0.2 $\mu\text{M}$ , 0.4 $\mu\text{M}$ , 0.6 $\mu\text{M}$ and 0.8 $\mu\text{M}$ solutions of Rhodamine-B has been used. The quantum yield of Rhodamine-B is 31%. |                          |

To determine the efficiency of emission, the quantum yield was calculated for all the samples. Relative quantum yield technique was used for the determination of quantum yield. Rhodamine-B dissolved in water was used as an internal standard. After dissolving the known amounts of compounds, **THN(6)6** and **THN(9)6**, in DCM with different concentration, absorption and emission spectra were recorded. A plot consisting of emission vs absorption intensity was obtained as shown in Fig. S41. The slope (gradient) obtained from this plot was used for the calculation of relative quantum yield using the formula given below.

$$\Phi_x = \Phi_{\text{std}} [\text{Grad}_x / \text{Grad}_{\text{std}}] [\eta^2_x / \eta^2_{\text{std}}]$$

$\Phi_x$  – Quantum yield of the unknown sample (LC)

$\Phi_{\text{std}}$  – Quantum yield of the standard (Rhodamine B)

$\text{Grad}_x$  – slope/gradient obtained for the plot of unknown sample (LC)

$\text{Grad}_{\text{std}}$  – slope/gradient obtained for the plot of Standard sample

$\eta^2_x$  – refractive index of the solvent used for standard

$\eta^2_{\text{std}}$  – refractive index of the solvent used for unknown (LC)

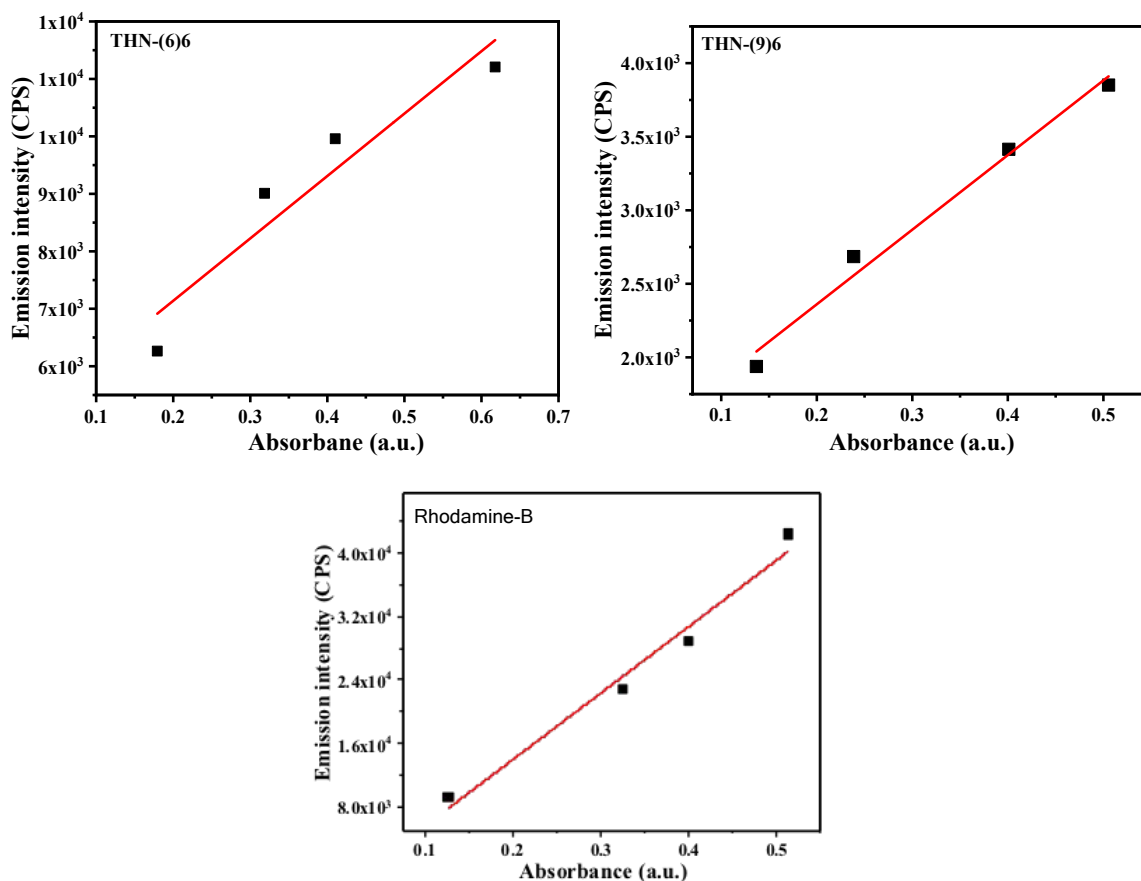

**Figure S52.** Plots of integrated fluorescence intensity vs the absorbance of compounds **THN(6)6**, and **THN(9)6** at 0.2  $\mu\text{M}$ , 0.4  $\mu\text{M}$ , 0.6  $\mu\text{M}$  and 0.8  $\mu\text{M}$  concentration in dichloromethane (DCM) and the same obtained for Rhodamine B dissolved in water at same concentrations.

## References

1. Yelamaggad, C. V.; Achalkumar, A. S.; Rao D. S. S.; Prasad, S. K. A New Class of Discotic Mesogens Derived from Tris(*N*-salicylideneaniline)s Existing in  $C_{3h}$  and  $C_s$  Keto-Enamine Forms, *J. Org. Chem.*, **2007**, 72, 8308–8318.
2. Yelamaggad, C. V.; Achalkumar, A. S.; Rao D. S. S.; Prasad, S. K. The first examples of optically active tris(*N*-salicylideneaniline)s: manifestation of chirality from molecules to fluid columnar phases, *J. Mater. Chem.*, **2007**, 17, 4521–4529.
3. Yelamaggad, C. V.; Achalkumar, A. S.; Rao D. S. S.; Prasad, S. K. Luminescent, Liquid Crystalline Tris(*N*-salicylideneaniline)s: Synthesis and Characterization, *J. Org. Chem.*, **2009**, 74, 3168–3171.
4. Yelamaggad, C. V.; Achalkumar, A. S. Light emitting, star-shaped tris(*N*-salicylideneaniline) discotic liquid crystals bearing trans-stilbene fluorophores: synthesis and characterization, *Tetrahedron Lett.*, **2012**, 53, 7108–7112.
5. Lee, H. Y.; Song, X.; Park, H.; Baik, M.-H.; Lee, D. Torsionally Responsive  $C_3$ -Symmetric Azo Dyes: Azo–Hydrazone Tautomerism, Conformational Switching, and Application for Chemical Sensing, *J. Am. Chem. Soc.* **2010**, 132, 34, 12133–12144.
